# Supplementary material for: IMiDs induce FAM83F degradation via an interaction with CK1α to attenuate Wnt signalling
Source: PubMed Central journal article supplement (PMC7768194; doi:10.26508/lsa.202000804), 2020-12-23

Figure 4A.

DLD-1

|                   |   |   |   |   |   |   |   |   |   |   |
|-------------------|---|---|---|---|---|---|---|---|---|---|
| 10uM Thalidomide  | - | + | + | + | - | - | - | - | - | - |
| 10uM Lenalidomide | - | - | - | - | + | + | + | - | - | - |
| 10uM Pomalidomide | - | - | - | - | - | - | - | + | + | + |
| 1uM MLN4924       | - | - | + | - | - | + | - | - | + | - |
| 5uM Bortezamib    | - | - | - | + | - | - | + | - | - | + |

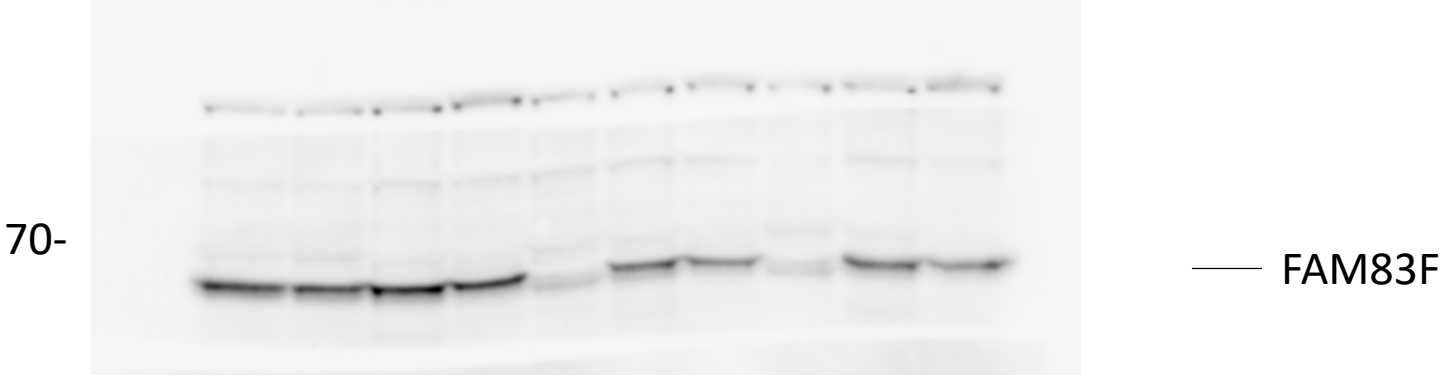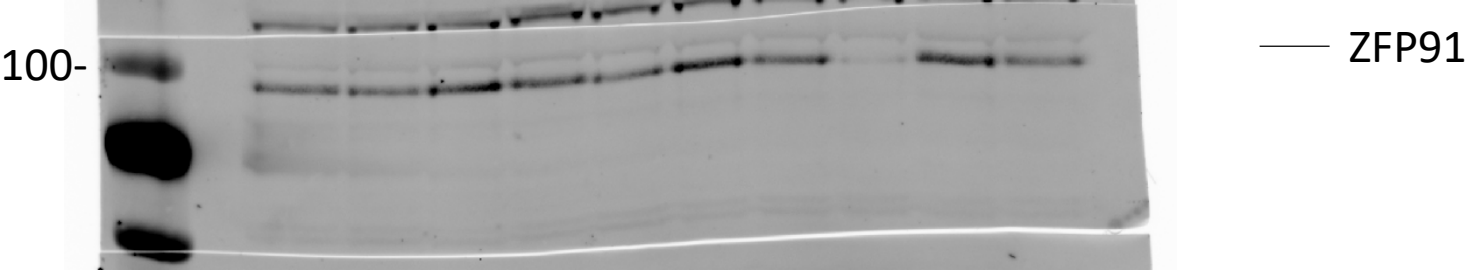

Figure 4A.

|                   | DLD-1 |   |   |   |   |   |   |   |   |   |
|-------------------|-------|---|---|---|---|---|---|---|---|---|
| 10uM Thalidomide  | -     | + | + | + | - | - | - | - | - | - |
| 10uM Lenalidomide | -     | - | - | - | + | + | + | - | - | - |
| 10uM Pomalidomide | -     | - | - | - | - | - | - | + | + | + |
| 1uM MLN4924       | -     | - | + | - | - | + | - | - | + | - |
| 5uM Bortezamib    | -     | - | - | + | - | - | + | - | - | + |

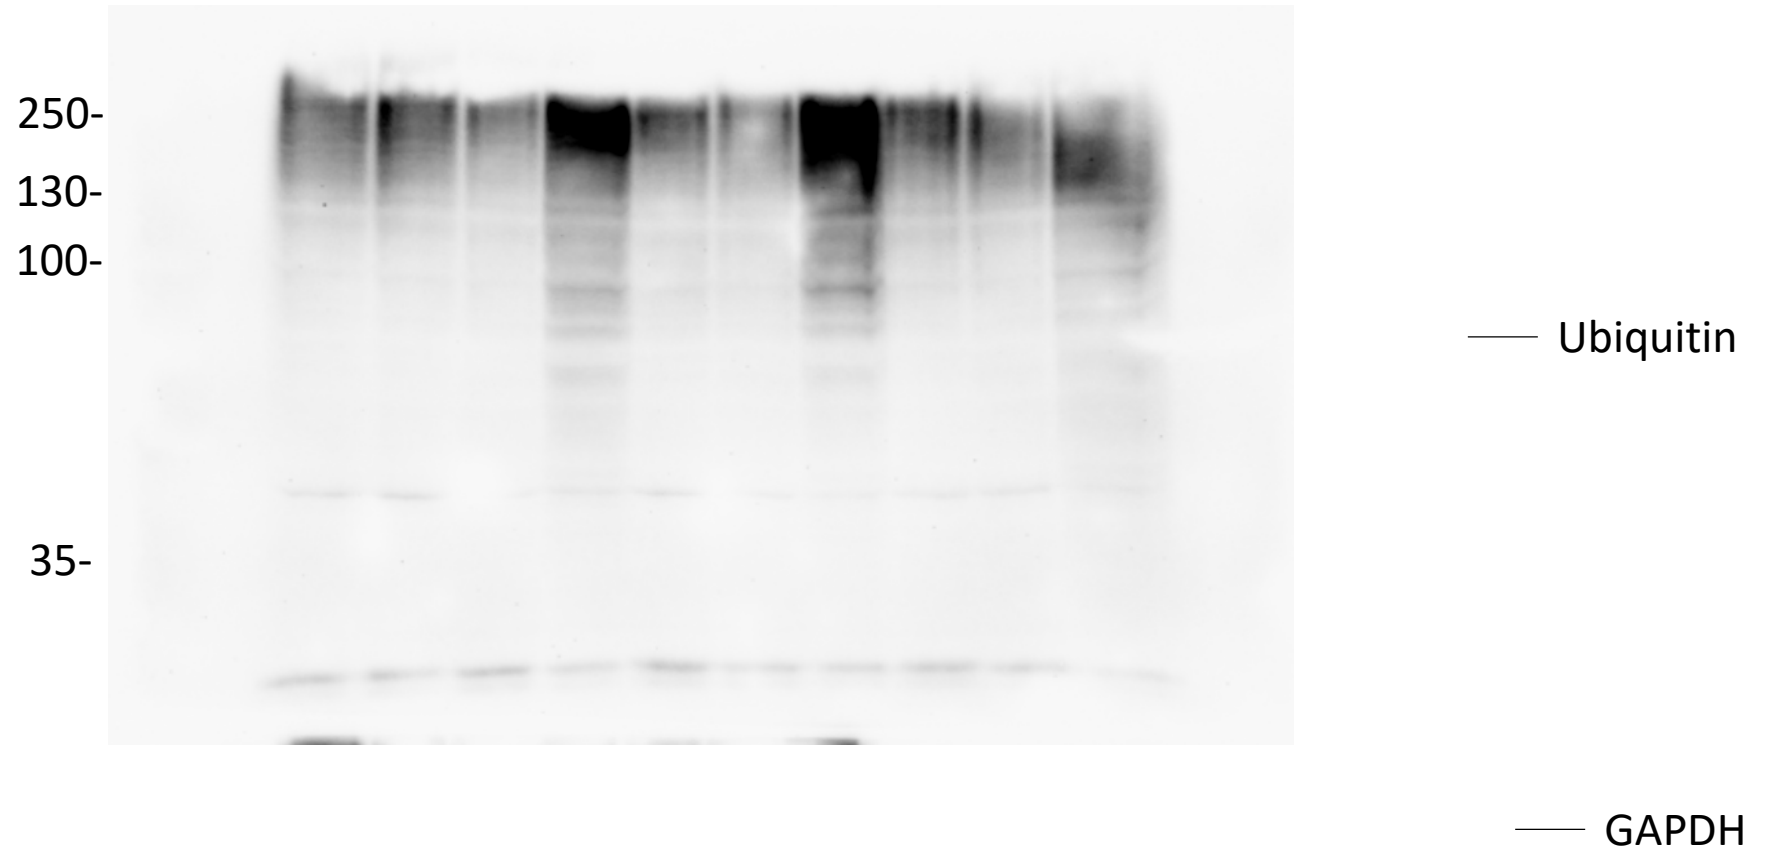

Figure 4A.

DLD-1

|                   |   |   |   |   |   |   |   |   |   |   |
|-------------------|---|---|---|---|---|---|---|---|---|---|
| 10uM Thalidomide  | - | + | + | + | - | - | - | - | - | - |
| 10uM Lenalidomide | - | - | - | - | + | + | + | - | - | - |
| 10uM Pomalidomide | - | - | - | - | - | - | - | + | + | + |
| 1uM MLN4924       | - | - | + | - | - | + | - | - | + | - |
| 5uM Bortezamib    | - | - | - | + | - | - | + | - | - | + |

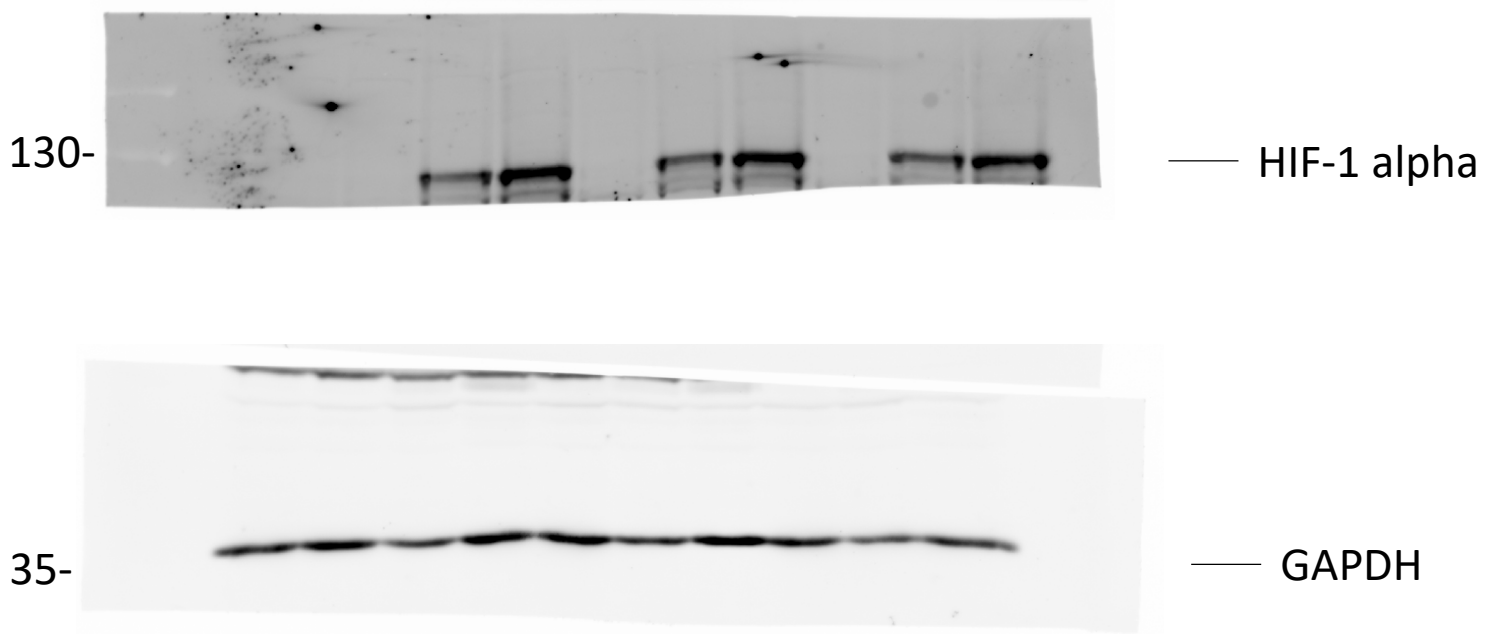

Figure 4A.

HCT116

|                   |   |   |   |   |   |   |   |   |   |   |
|-------------------|---|---|---|---|---|---|---|---|---|---|
| 10uM Thalidomide  | - | + | + | + | - | - | - | - | - | - |
| 10uM Lenalidomide | - | - | - | - | + | + | + | - | - | - |
| 10uM Pomalidomide | - | - | - | - | - | - | - | + | + | + |
| 1uM MLN4924       | - | - | + | - | - | + | - | - | + | - |
| 5uM Bortezamib    | - | - | - | + | - | - | + | - | - | + |

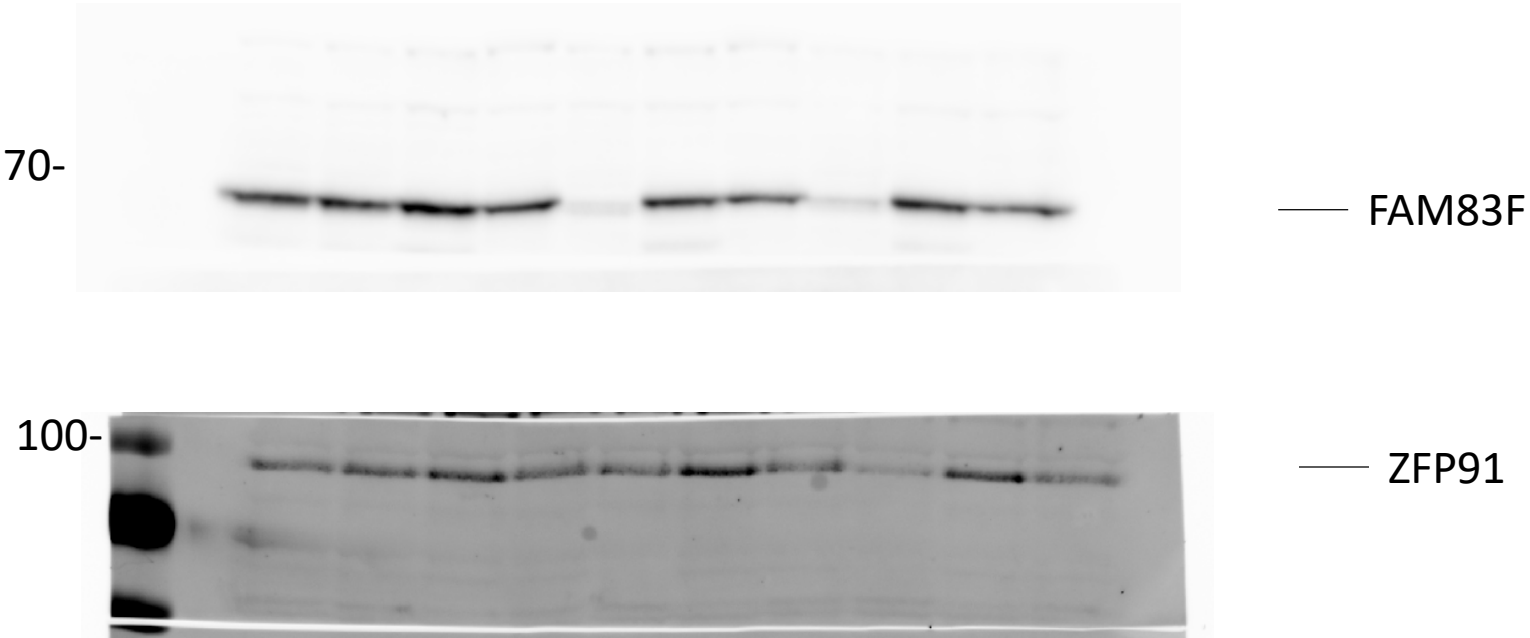

Figure 4A.

HCT116

|                   |   |   |   |   |   |   |   |   |   |   |
|-------------------|---|---|---|---|---|---|---|---|---|---|
| 10uM Thalidomide  | - | + | + | + | - | - | - | - | - | - |
| 10uM Lenalidomide | - | - | - | - | + | + | + | - | - | - |
| 10uM Pomalidomide | - | - | - | - | - | - | - | + | + | + |
| 1uM MLN4924       | - | - | + | - | - | + | - | - | + | - |
| 5uM Bortezamib    | - | - | - | + | - | - | + | - | - | + |

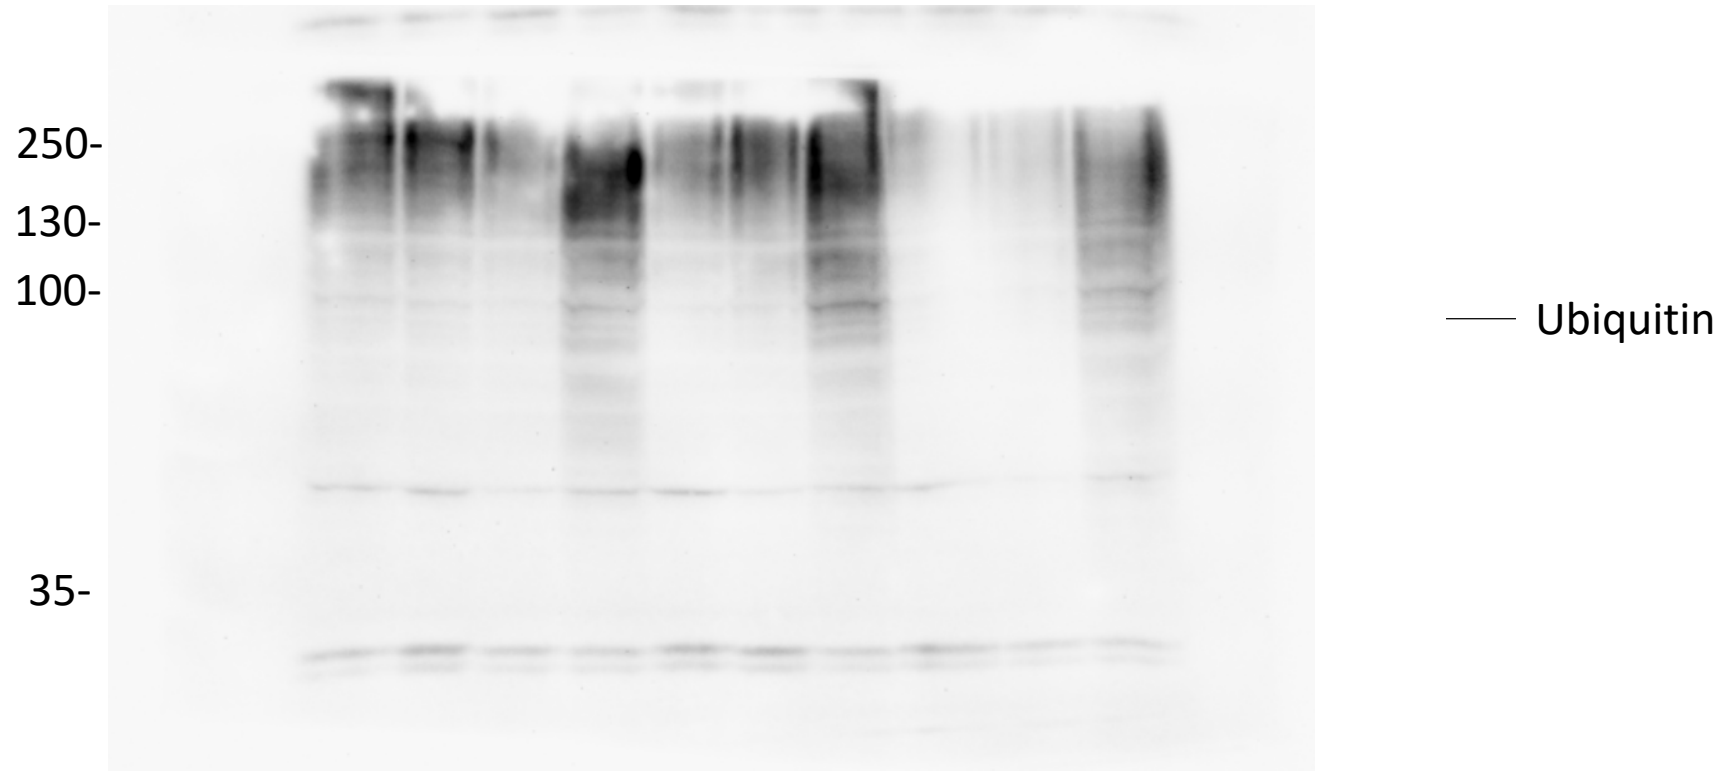

Figure 4A.

HCT116

|                   |   |   |   |   |   |   |   |   |   |   |
|-------------------|---|---|---|---|---|---|---|---|---|---|
| 10uM Thalidomide  | - | + | + | + | - | - | - | - | - | - |
| 10uM Lenalidomide | - | - | - | - | + | + | + | - | - | - |
| 10uM Pomalidomide | - | - | - | - | - | - | - | + | + | + |
| 1uM MLN4924       | - | - | + | - | - | + | - | - | + | - |
| 5uM Bortezamib    | - | - | - | + | - | - | + | - | - | + |

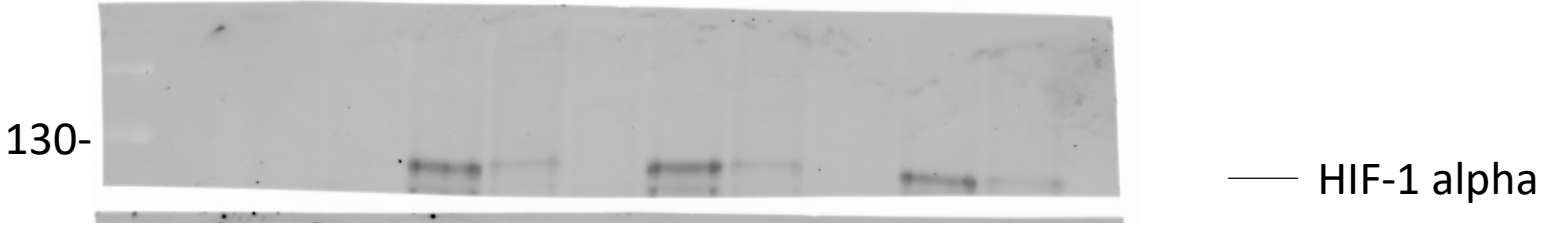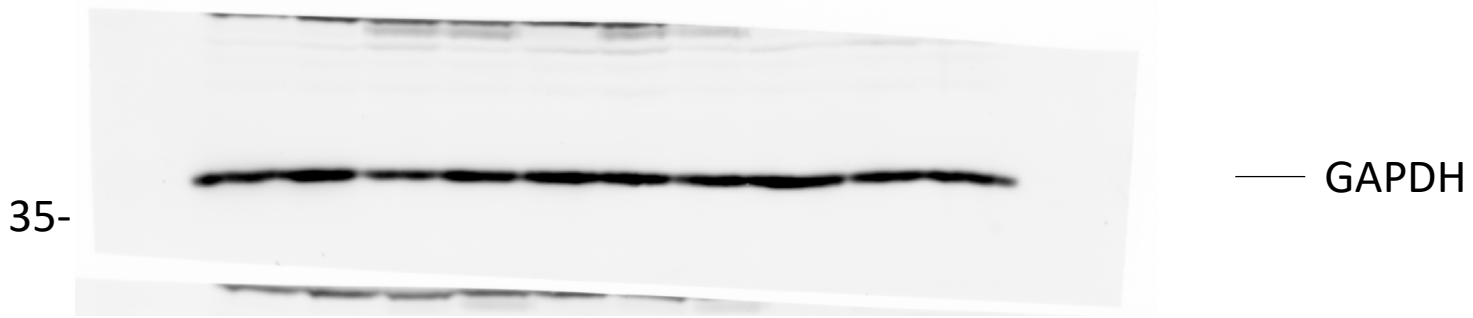

Figure 4B.

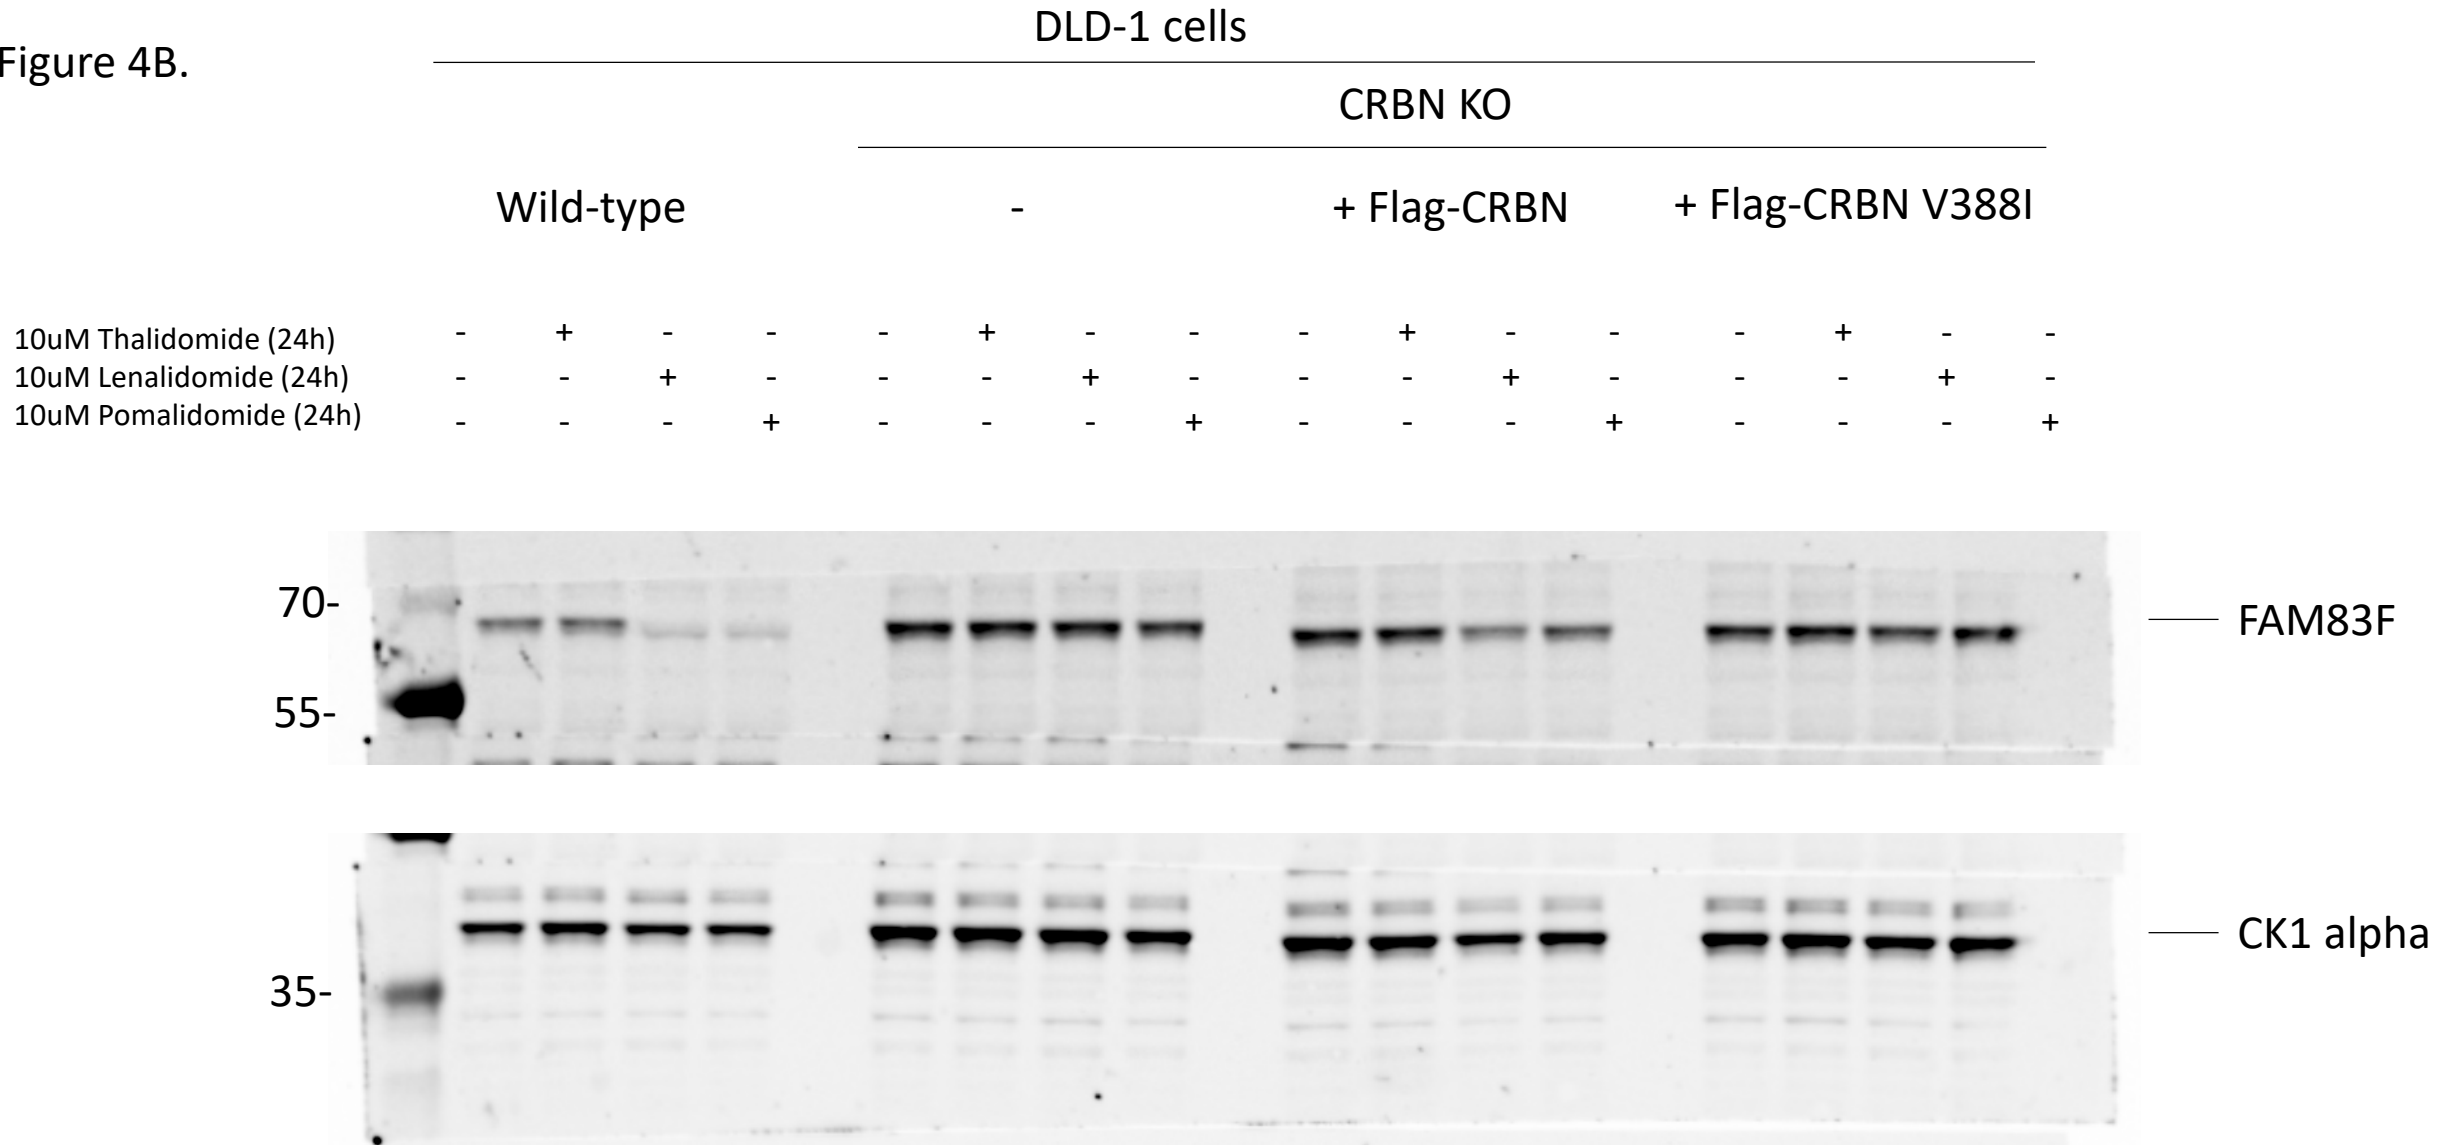

Figure 4B.

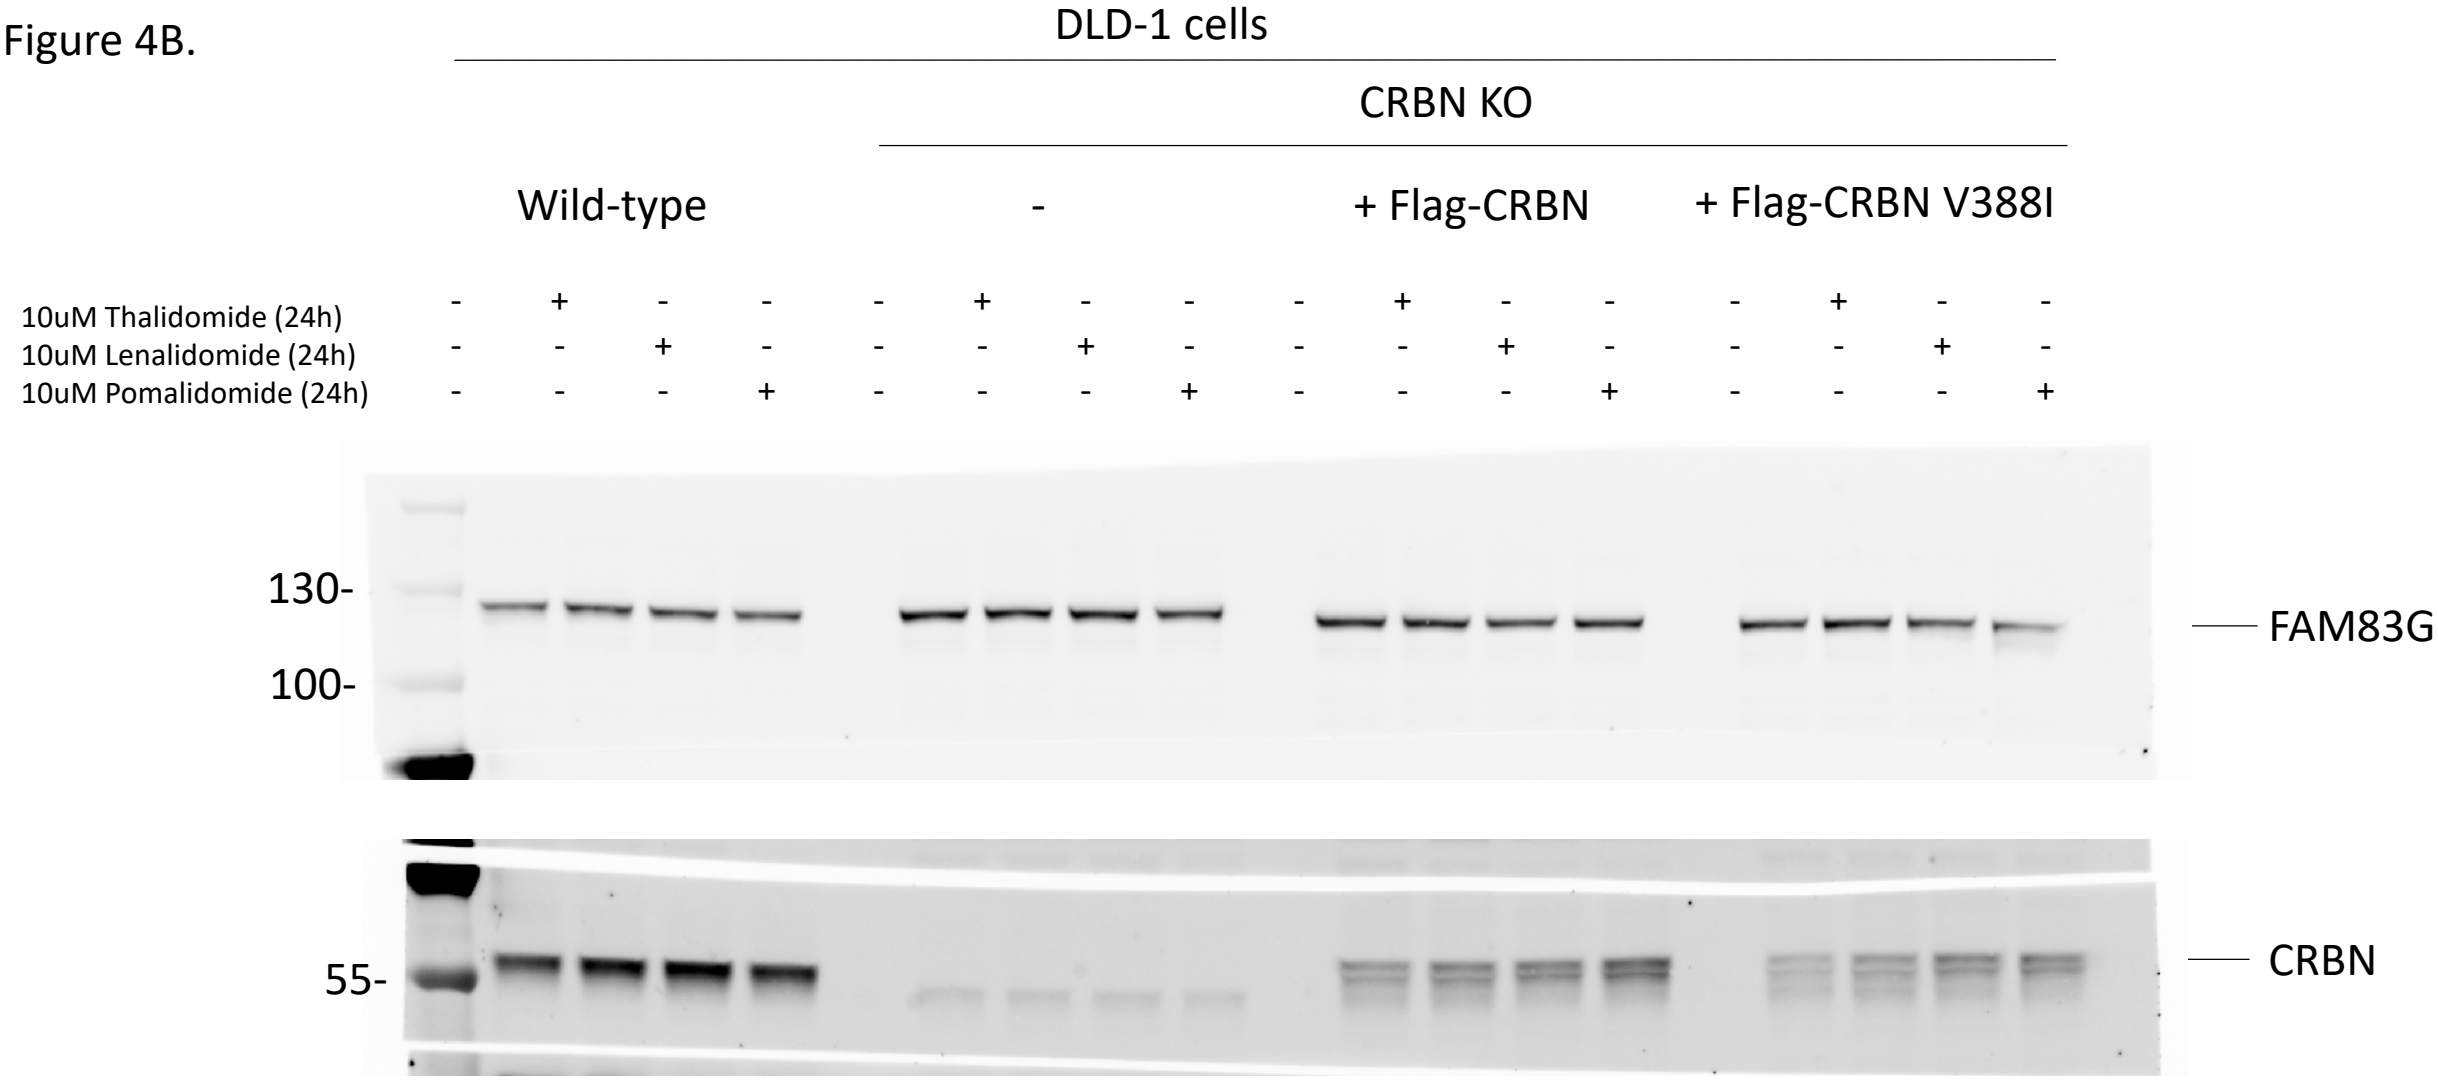



Figure 4B.

|                         |  | DLD-1 cells |   |   |   |         |   |   |   |             |   |   |   |                   |   |   |   |
|-------------------------|--|-------------|---|---|---|---------|---|---|---|-------------|---|---|---|-------------------|---|---|---|
|                         |  | Wild-type   |   |   |   | CRBN KO |   |   |   |             |   |   |   |                   |   |   |   |
|                         |  |             |   |   |   | -       |   |   |   | + Flag-CRBN |   |   |   | + Flag-CRBN V388I |   |   |   |
|                         |  | -           | + | - | - | -       | + | - | - | -           | + | - | - | -                 | + | - | - |
| 10uM Thalidomide (24h)  |  | -           | + | - | - | -       | + | - | - | -           | + | - | - | -                 | + | - | - |
| 10uM Lenalidomide (24h) |  | -           | - | + | - | -       | - | + | - | -           | - | + | - | -                 | - | + | - |
| 10uM Pomalidomide (24h) |  | -           | - | - | + | -       | - | - | + | -           | - | - | + | -                 | - | - | + |

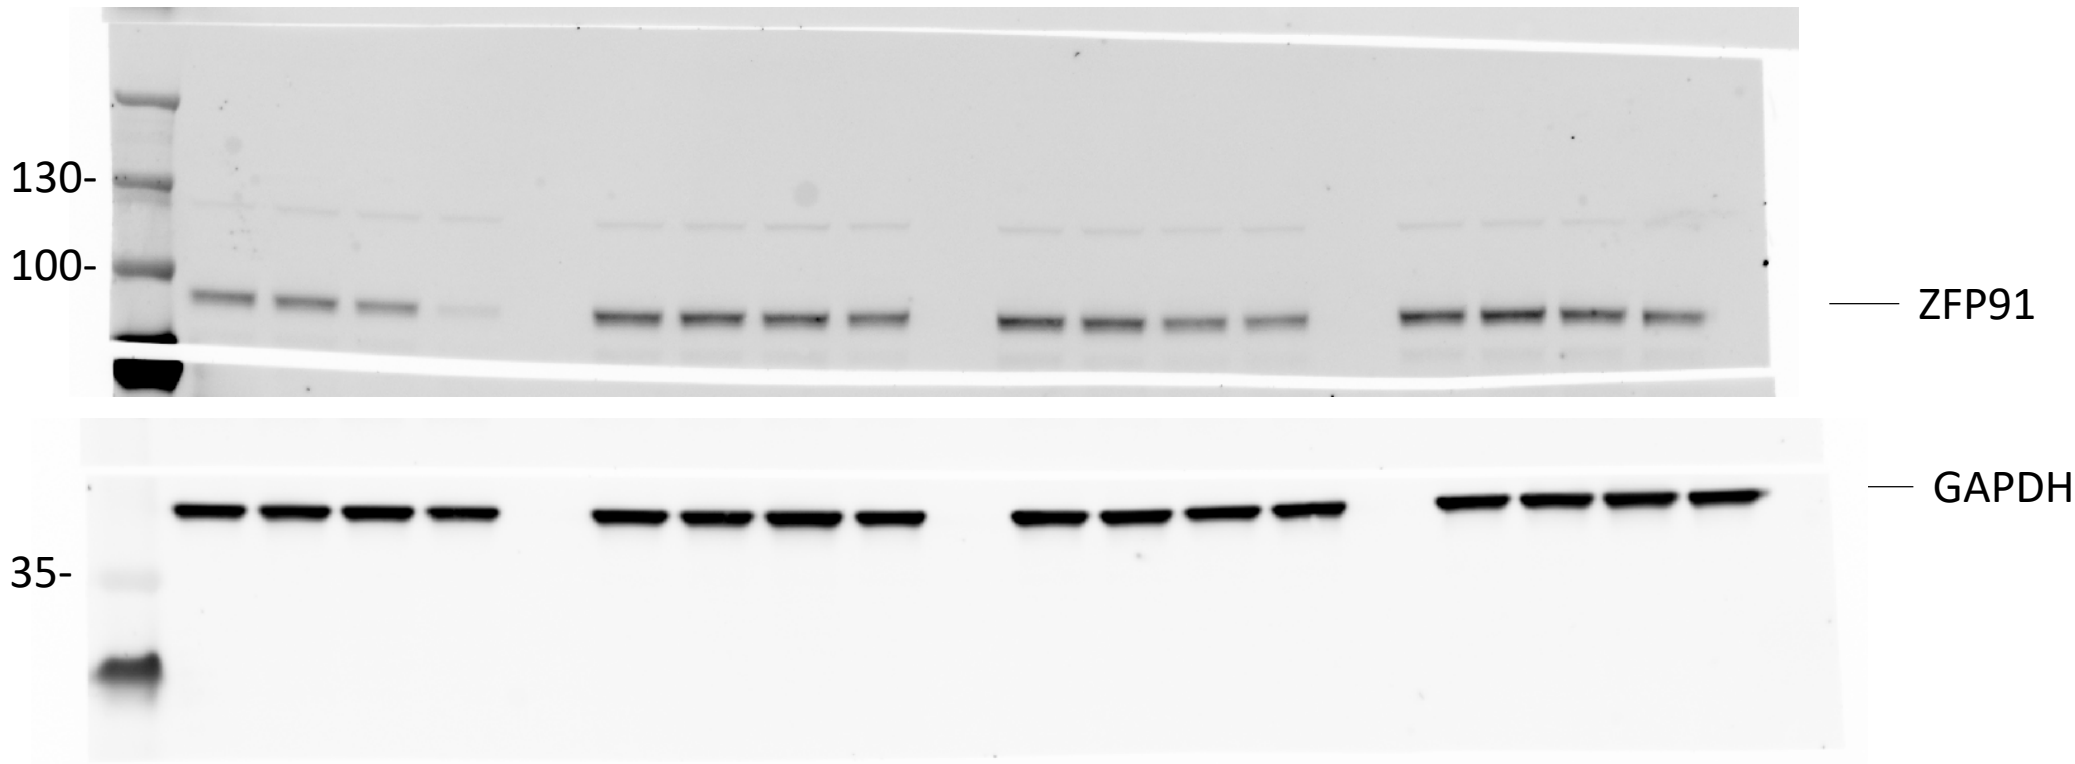

Supplement: LSA-2020-00804_SdataF4.pdf [file LSA-2020-00804_SdataF4.pdf]
