# Supplementary material for: IMiDs induce FAM83F degradation via an interaction with CK1α to attenuate Wnt signalling
Source: PubMed Central journal article supplement (PMC7768194; doi:10.26508/lsa.202000804), 2020-12-23

Sup. Figure 1A.

|                         | U20S |   |   |   | HEK293 |   |   |   | ARPE19 |   |   |   |
|-------------------------|------|---|---|---|--------|---|---|---|--------|---|---|---|
| 10uM Thalidomide (24h)  | -    | + | - | - | -      | + | - | - | -      | + | - | - |
| 10uM Lenalidomide (24h) | -    | - | + | - | -      | - | + | - | -      | - | + | - |
| 10uM Pomalidomide (24h) | -    | - | - | + | -      | - | - | + | -      | - | - | + |

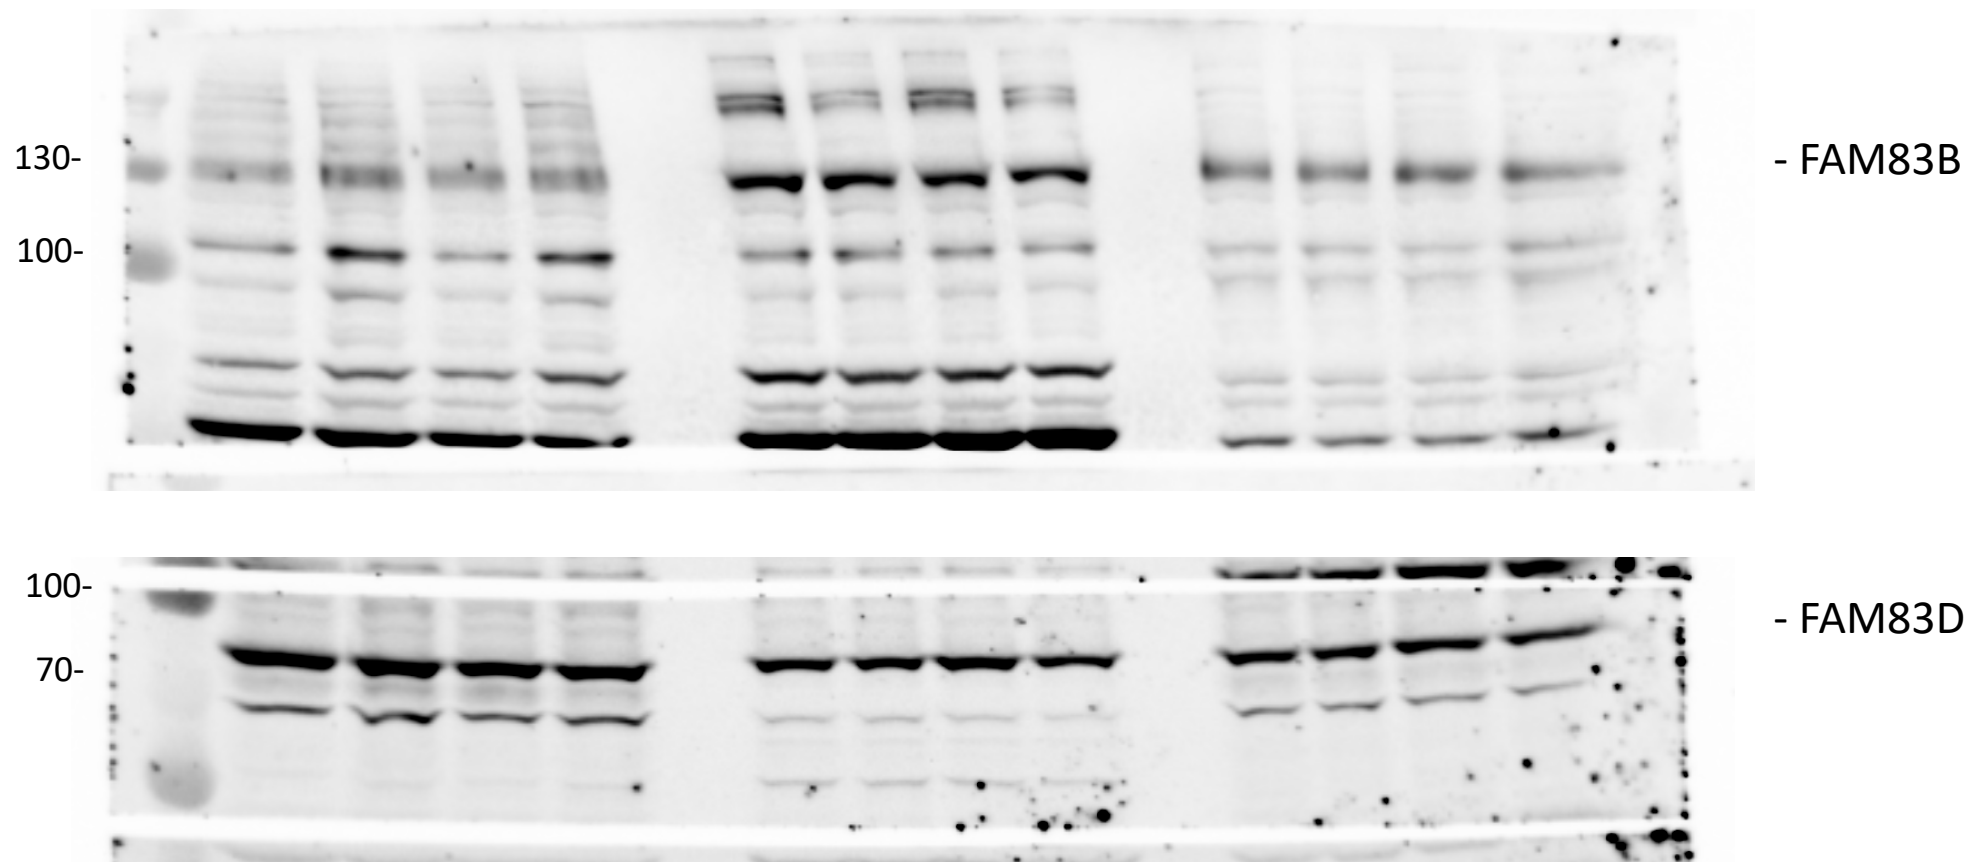

Sup. Figure 1A.

|                         | U20S |   |   |   | HEK293 |   |   |   | ARPE19 |   |   |   |
|-------------------------|------|---|---|---|--------|---|---|---|--------|---|---|---|
| 10uM Thalidomide (24h)  | -    | + | - | - | -      | + | - | - | -      | + | - | - |
| 10uM Lenalidomide (24h) | -    | - | + | - | -      | - | + | - | -      | - | + | - |
| 10uM Pomalidomide (24h) | -    | - | - | + | -      | - | - | + | -      | - | - | + |

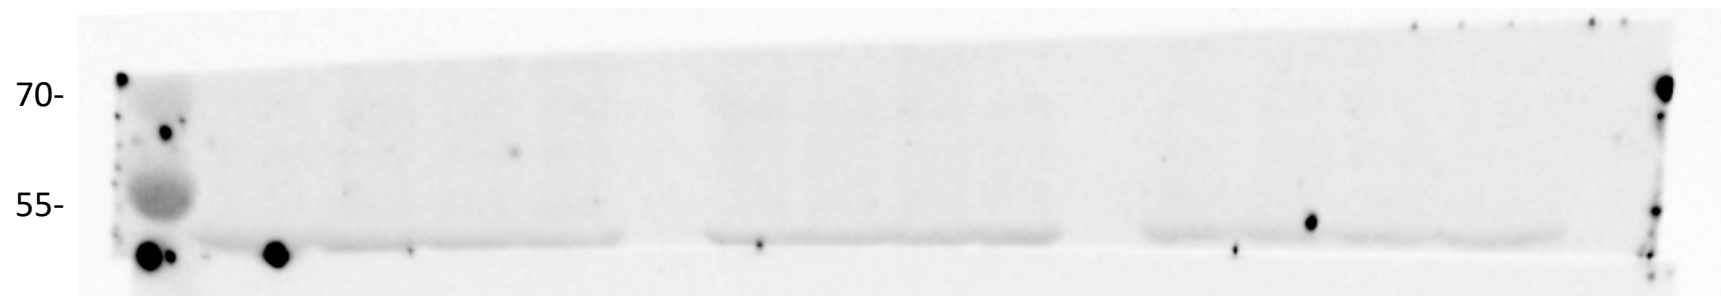

- FAM83F

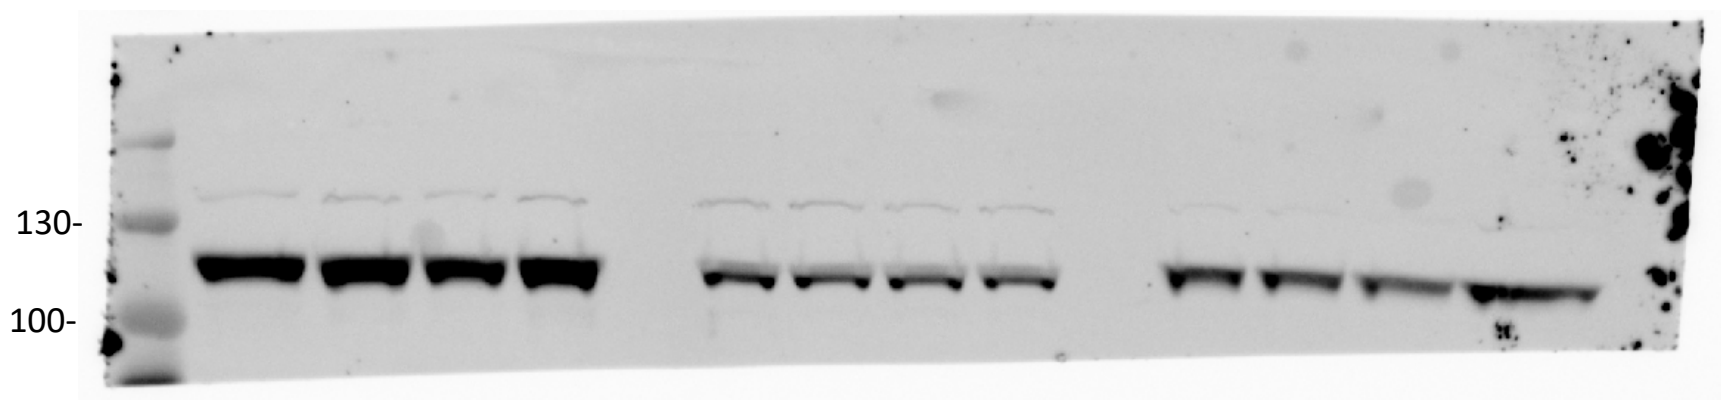

- FAM83G

Sup. Figure 1A.

|                         | U20S |   |   |   | HEK293 |   |   |   | ARPE19 |   |   |   |
|-------------------------|------|---|---|---|--------|---|---|---|--------|---|---|---|
| 10uM Thalidomide (24h)  | -    | + | - | - | -      | + | - | - | -      | + | - | - |
| 10uM Lenalidomide (24h) | -    | - | + | - | -      | - | + | - | -      | - | + | - |
| 10uM Pomalidomide (24h) | -    | - | - | + | -      | - | - | + | -      | - | - | + |

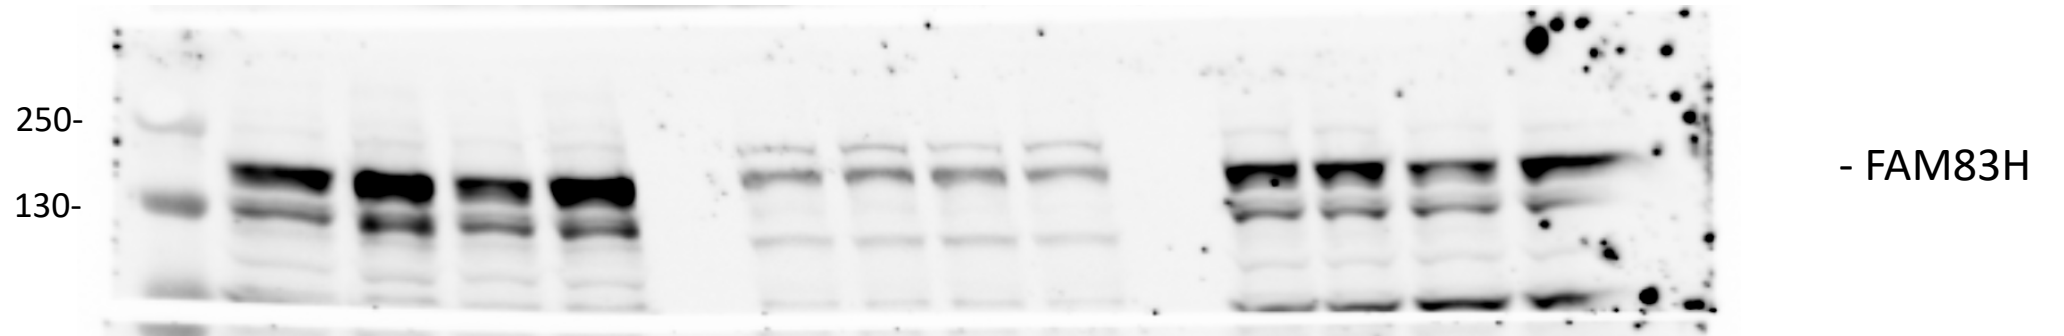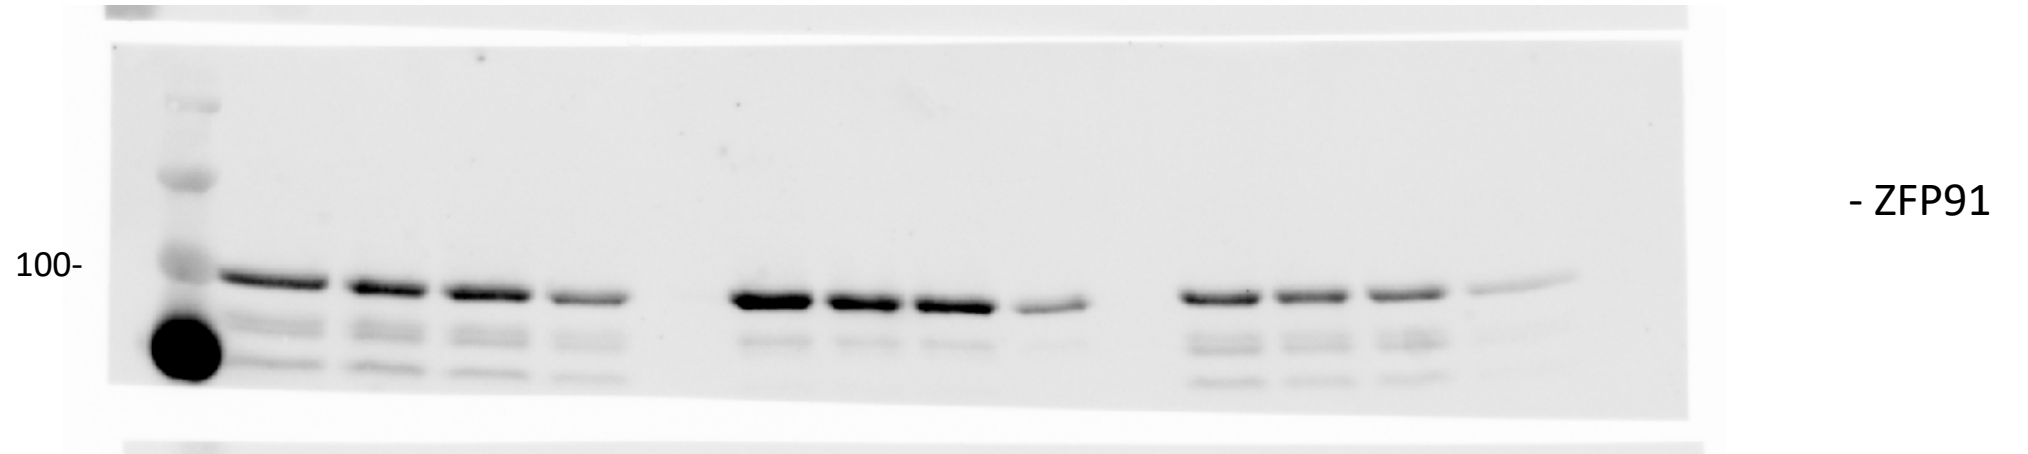

Sup. Figure 1A.

|                         | U20S |   |   |   | HEK293 |   |   |   | ARPE19 |   |   |   |
|-------------------------|------|---|---|---|--------|---|---|---|--------|---|---|---|
| 10uM Thalidomide (24h)  | -    | + | - | - | -      | + | - | - | -      | + | - | - |
| 10uM Lenalidomide (24h) | -    | - | + | - | -      | - | + | - | -      | - | + | - |
| 10uM Pomalidomide (24h) | -    | - | - | + | -      | - | - | + | -      | - | - | + |

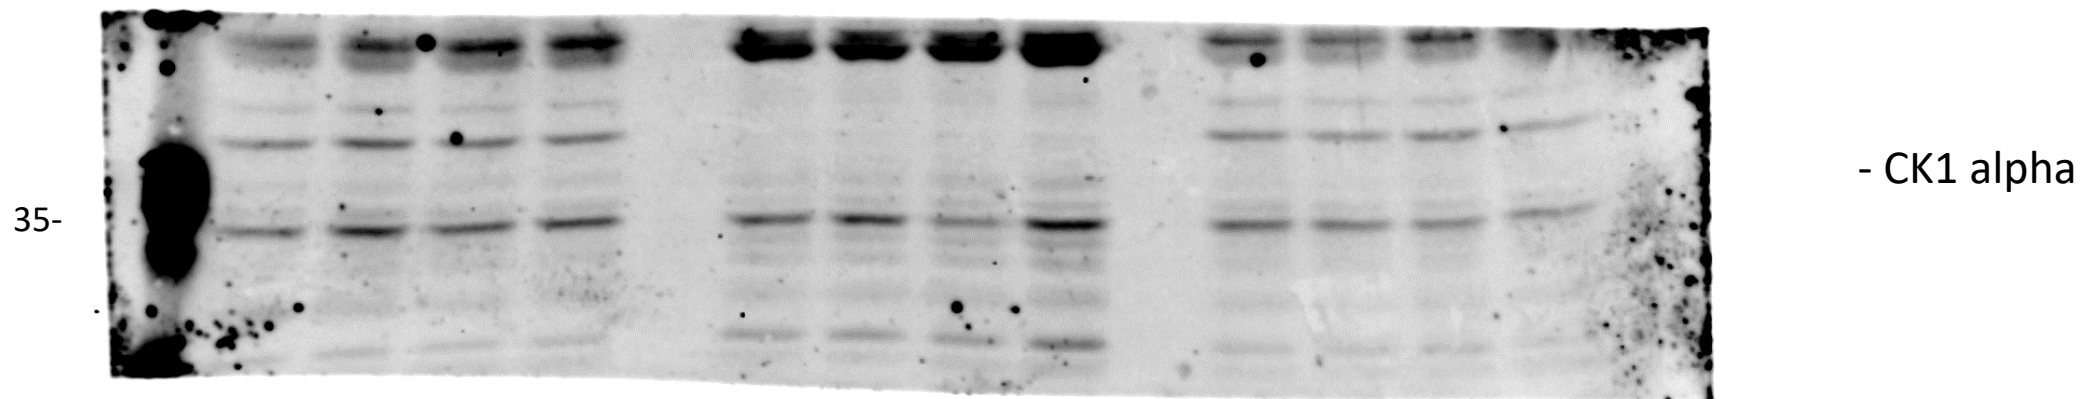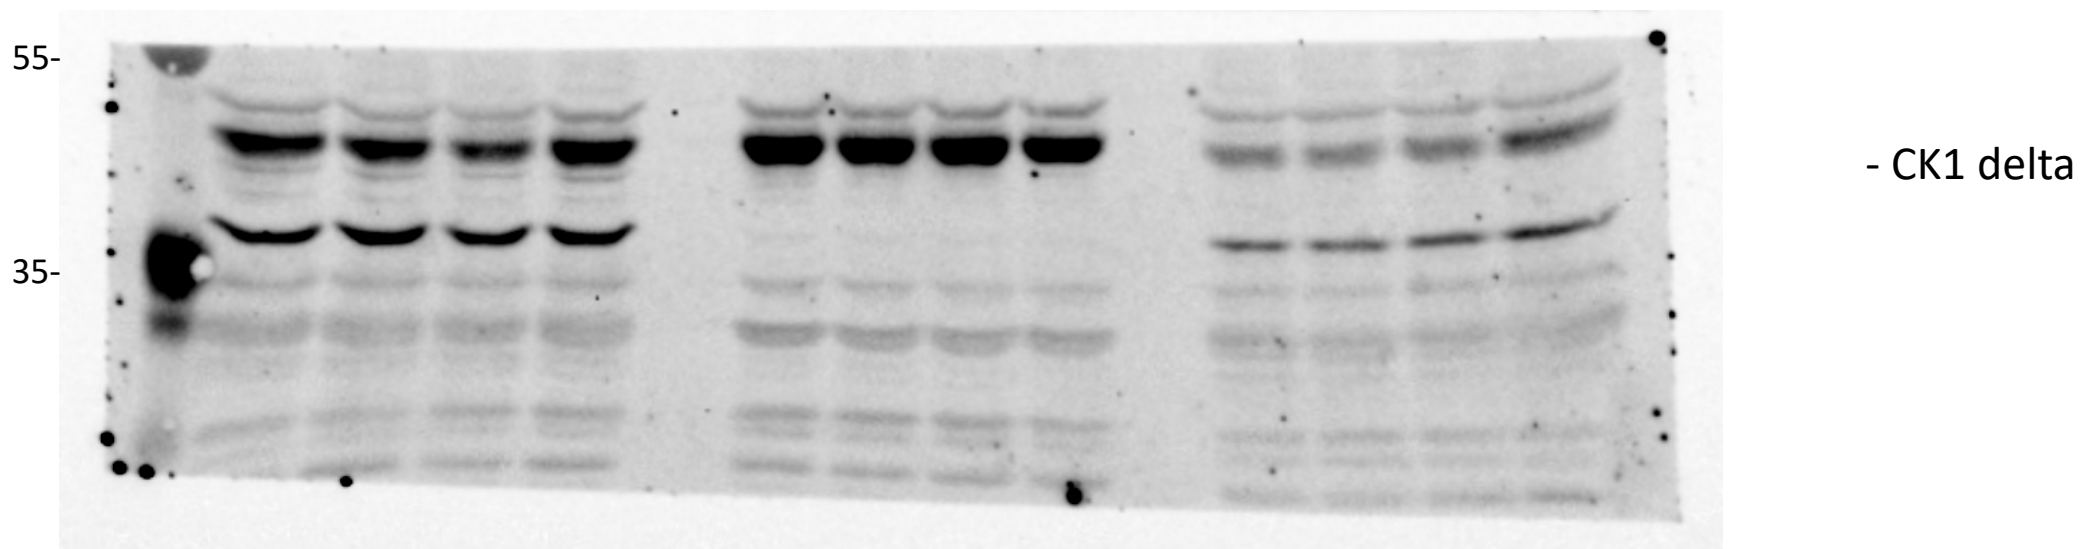

Sup. Figure 1A.

|                         | U20S |   |   |   | HEK293 |   |   |   | ARPE19 |   |   |   |
|-------------------------|------|---|---|---|--------|---|---|---|--------|---|---|---|
| 10uM Thalidomide (24h)  | -    | + | - | - | -      | + | - | - | -      | + | - | - |
| 10uM Lenalidomide (24h) | -    | - | + | - | -      | - | + | - | -      | - | + | - |
| 10uM Pomalidomide (24h) | -    | - | - | + | -      | - | - | + | -      | - | - | + |

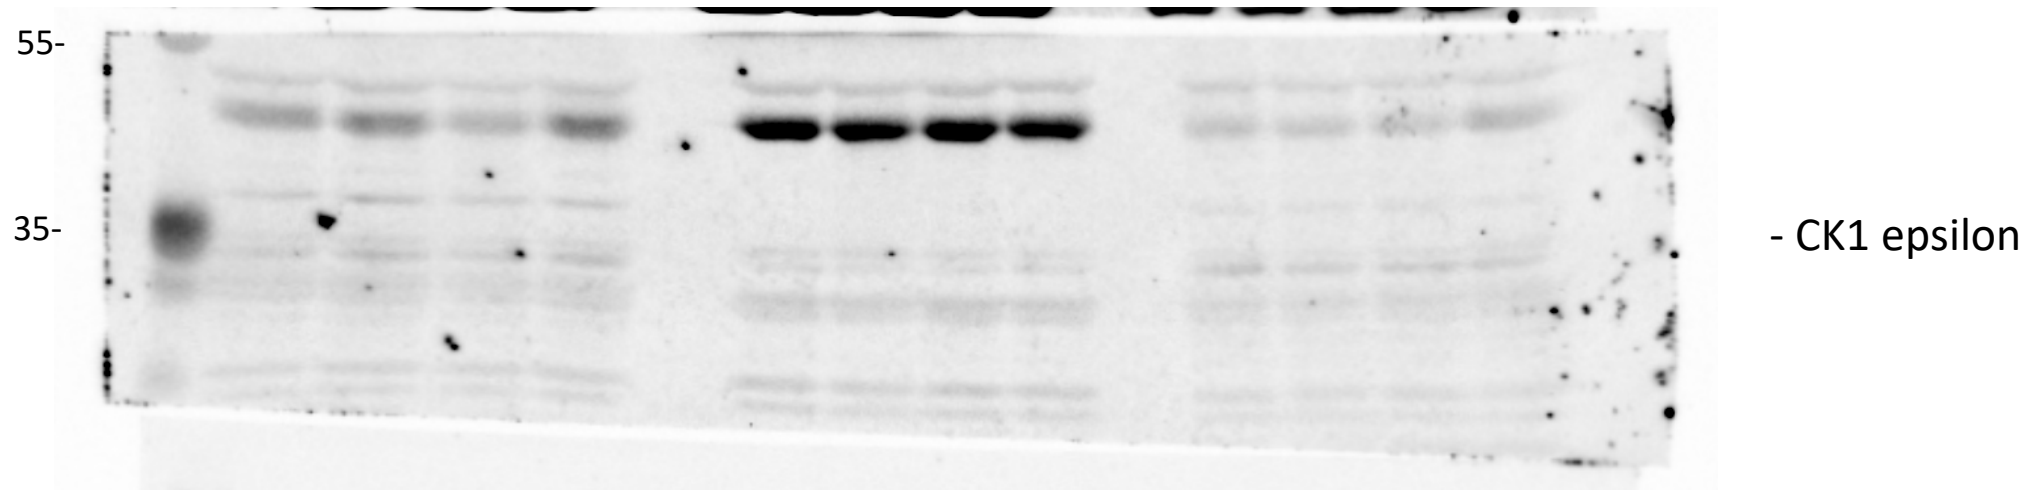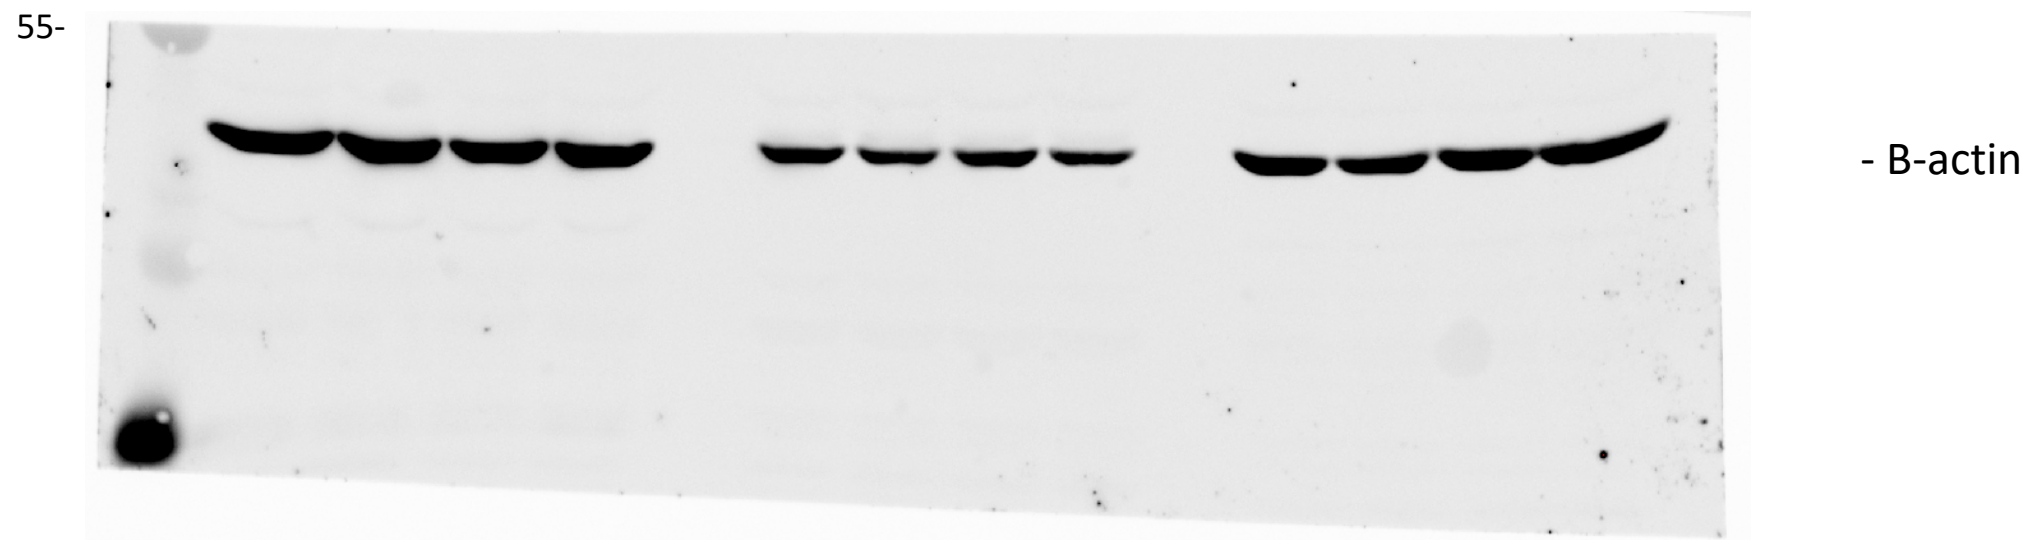

Sup. Figure 1B.

|                         | SH-SY5Y |   |   |   | G-361 |   |   |   | SK-mel-3 |   |   |   |
|-------------------------|---------|---|---|---|-------|---|---|---|----------|---|---|---|
| 10uM Thalidomide (24h)  | -       | + | - | - | -     | + | - | - | -        | + | - | - |
| 10uM Lenalidomide (24h) | -       | - | + | - | -     | - | + | - | -        | - | + | - |
| 10uM Pomalidomide (24h) | -       | - | - | + | -     | - | - | + | -        | - | - | + |

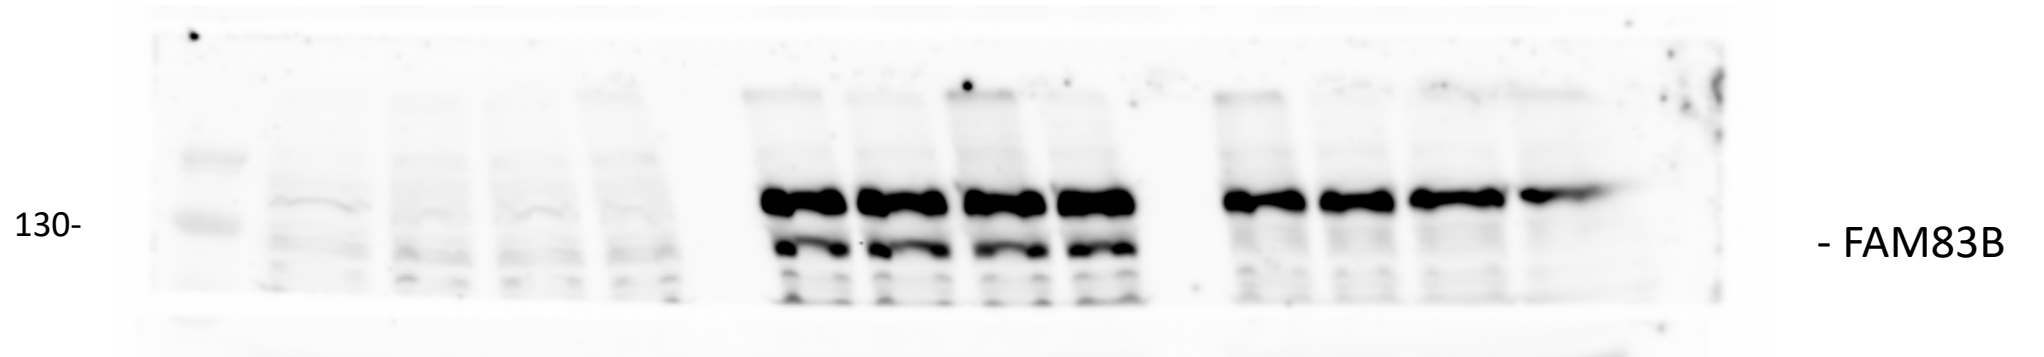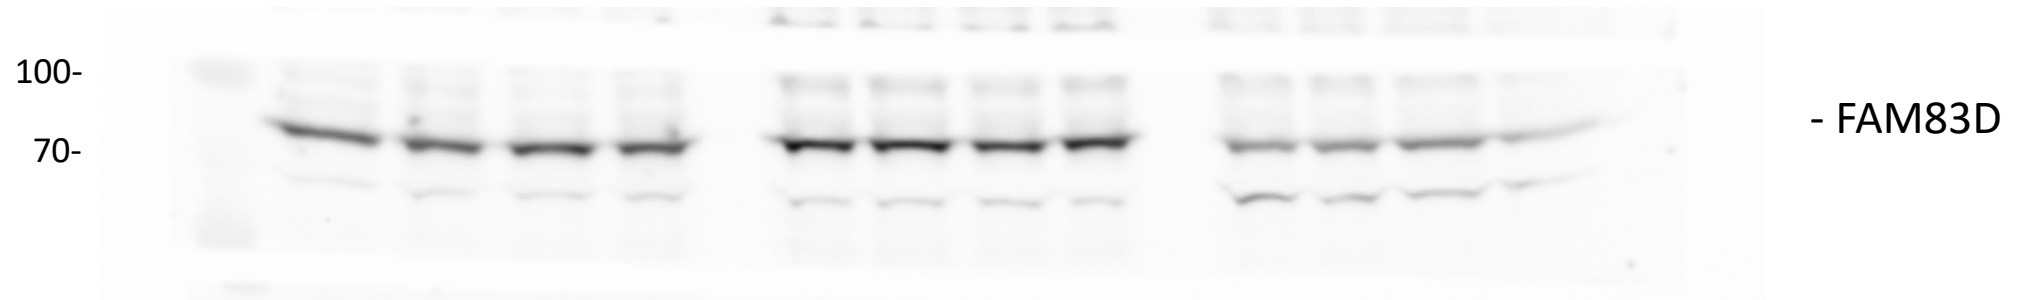

Sup. Figure 1B.

|                         | SH-SY5Y |   |   |   | G-361 |   |   |   | SK-mel-3 |   |   |   |
|-------------------------|---------|---|---|---|-------|---|---|---|----------|---|---|---|
| 10uM Thalidomide (24h)  | -       | + | - | - | -     | + | - | - | -        | + | - | - |
| 10uM Lenalidomide (24h) | -       | - | + | - | -     | - | + | - | -        | - | + | - |
| 10uM Pomalidomide (24h) | -       | - | - | + | -     | - | - | + | -        | - | - | + |

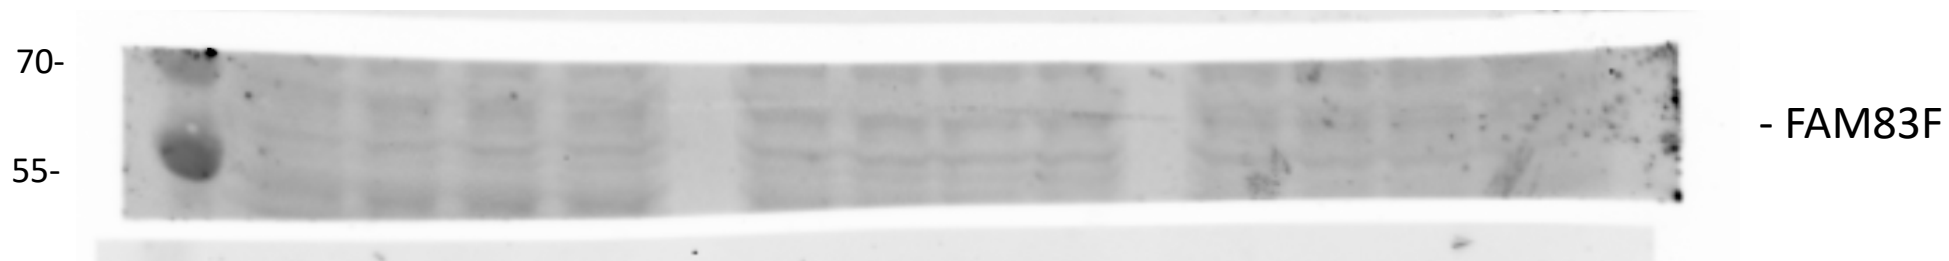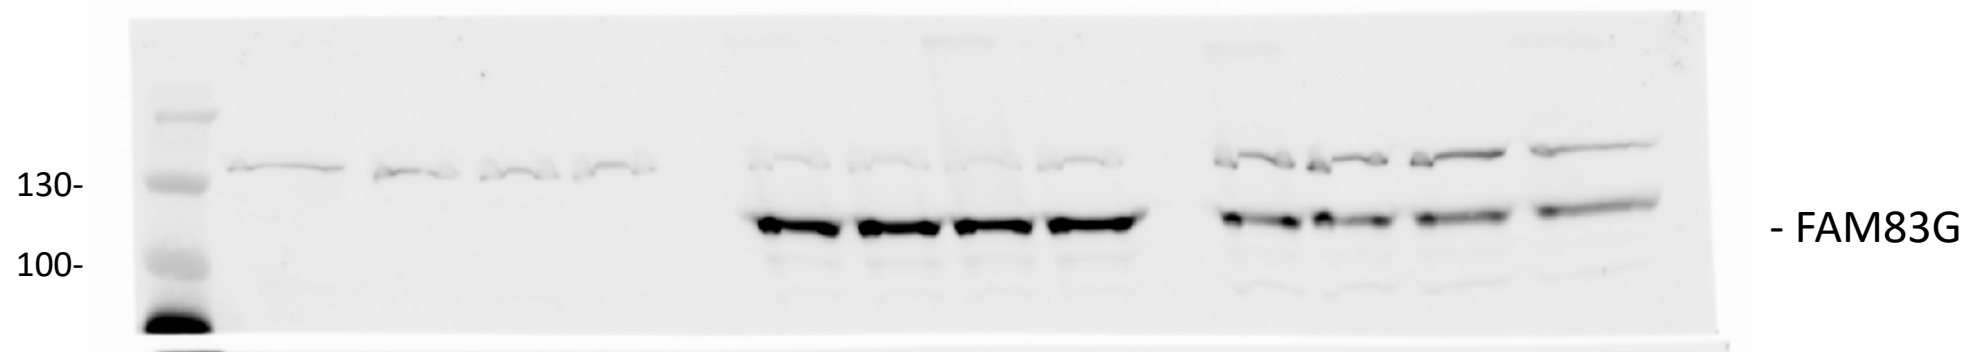

Sup. Figure 1B.

|                         | SH-SY5Y |   |   |   | G-361 |   |   |   | SK-mel-3 |   |   |   |
|-------------------------|---------|---|---|---|-------|---|---|---|----------|---|---|---|
| 10uM Thalidomide (24h)  | -       | + | - | - | -     | + | - | - | -        | + | - | - |
| 10uM Lenalidomide (24h) | -       | - | + | - | -     | - | + | - | -        | - | + | - |
| 10uM Pomalidomide (24h) | -       | - | - | + | -     | - | - | + | -        | - | - | + |

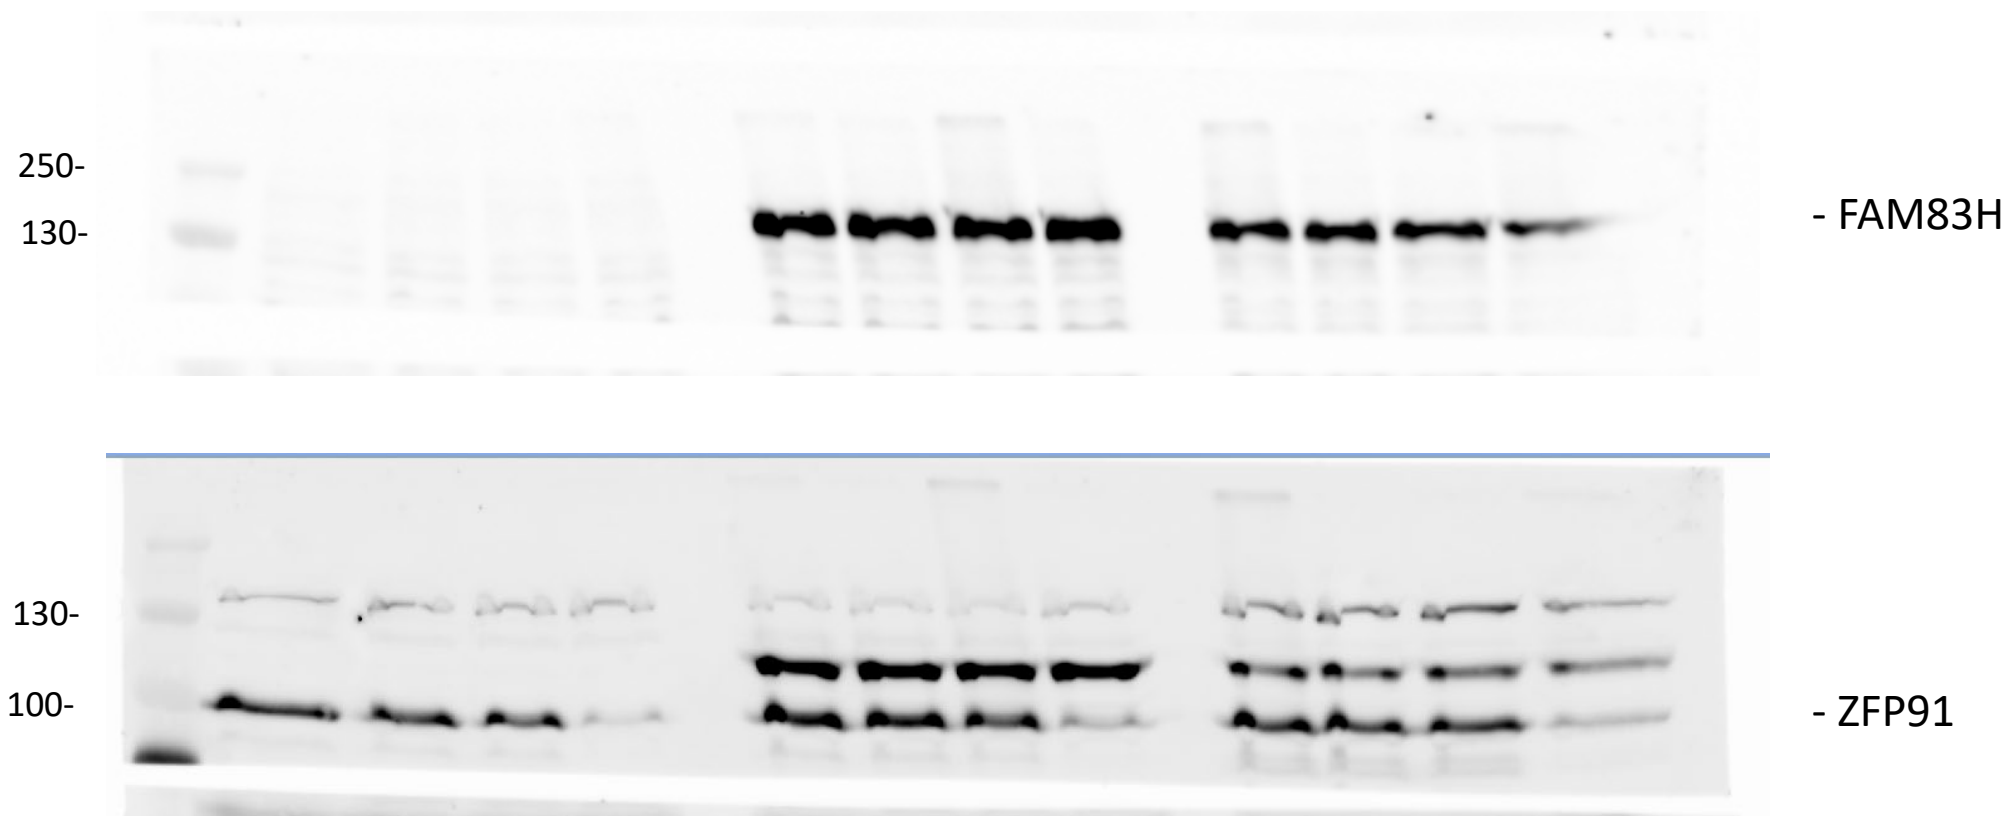



Sup. Figure 1B.

|                         | SH-SY5Y |   |   |   | G-361 |   |   |   | SK-mel-3 |   |   |   |
|-------------------------|---------|---|---|---|-------|---|---|---|----------|---|---|---|
| 10uM Thalidomide (24h)  | -       | + | - | - | -     | + | - | - | -        | + | - | - |
| 10uM Lenalidomide (24h) | -       | - | + | - | -     | - | + | - | -        | - | + | - |
| 10uM Pomalidomide (24h) | -       | - | - | + | -     | - | - | + | -        | - | - | + |

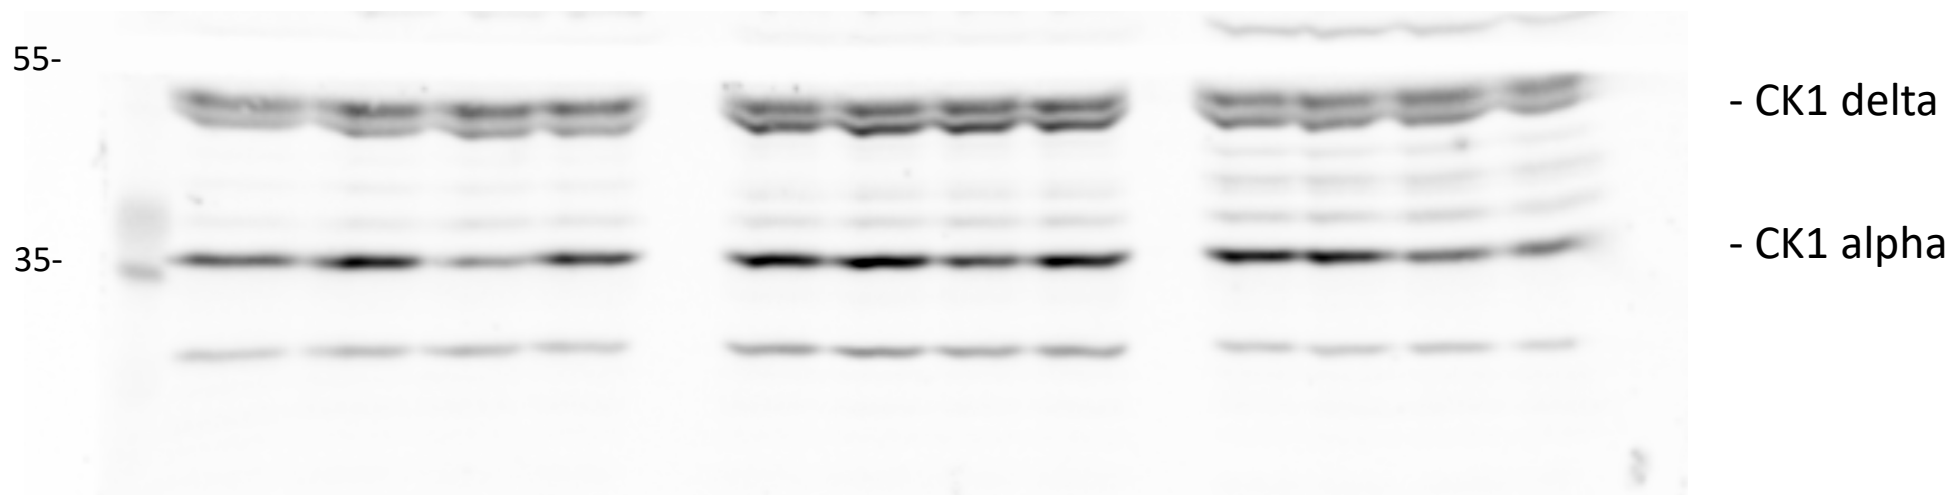

Sup. Figure 1B.

|                         | SH-SY5Y |   |   |   | G-361 |   |   |   | SK-mel-3 |   |   |   |
|-------------------------|---------|---|---|---|-------|---|---|---|----------|---|---|---|
| 10uM Thalidomide (24h)  | -       | + | - | - | -     | + | - | - | -        | + | - | - |
| 10uM Lenalidomide (24h) | -       | - | + | - | -     | - | + | - | -        | - | + | - |
| 10uM Pomalidomide (24h) | -       | - | - | + | -     | - | - | + | -        | - | - | + |

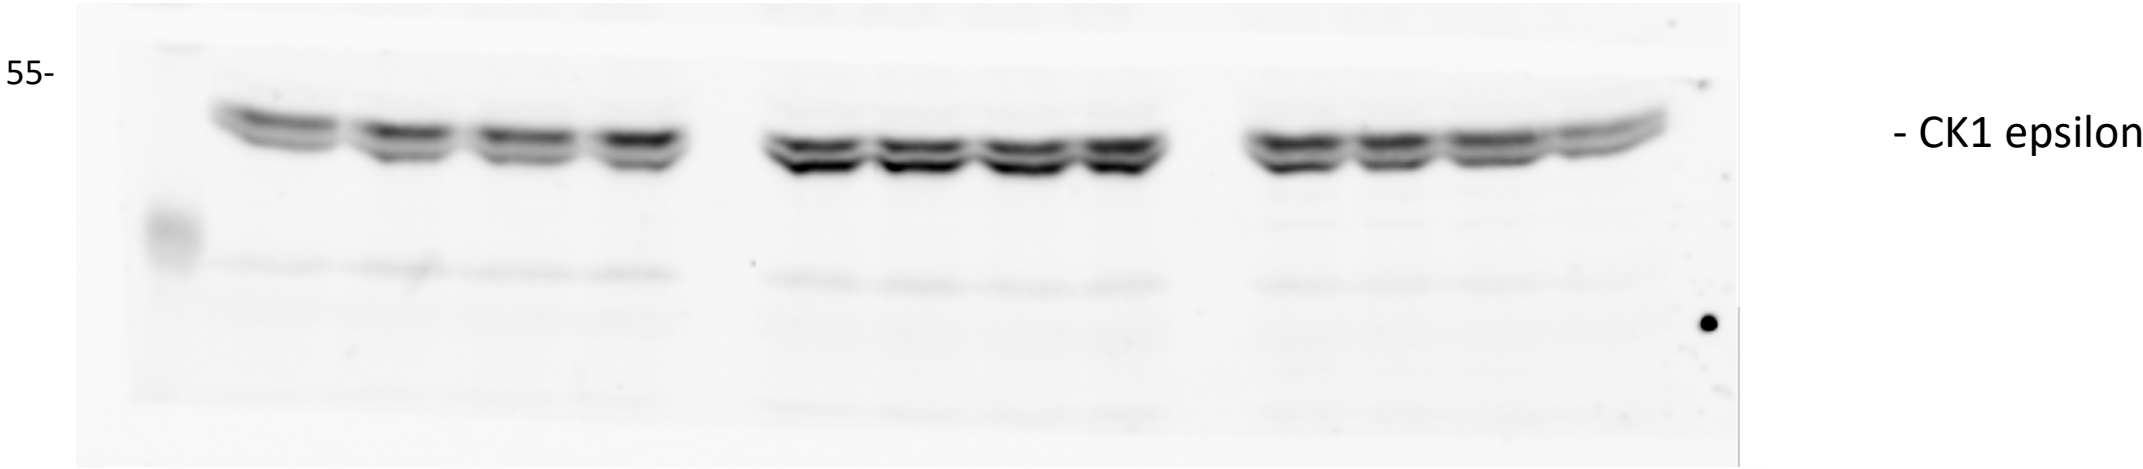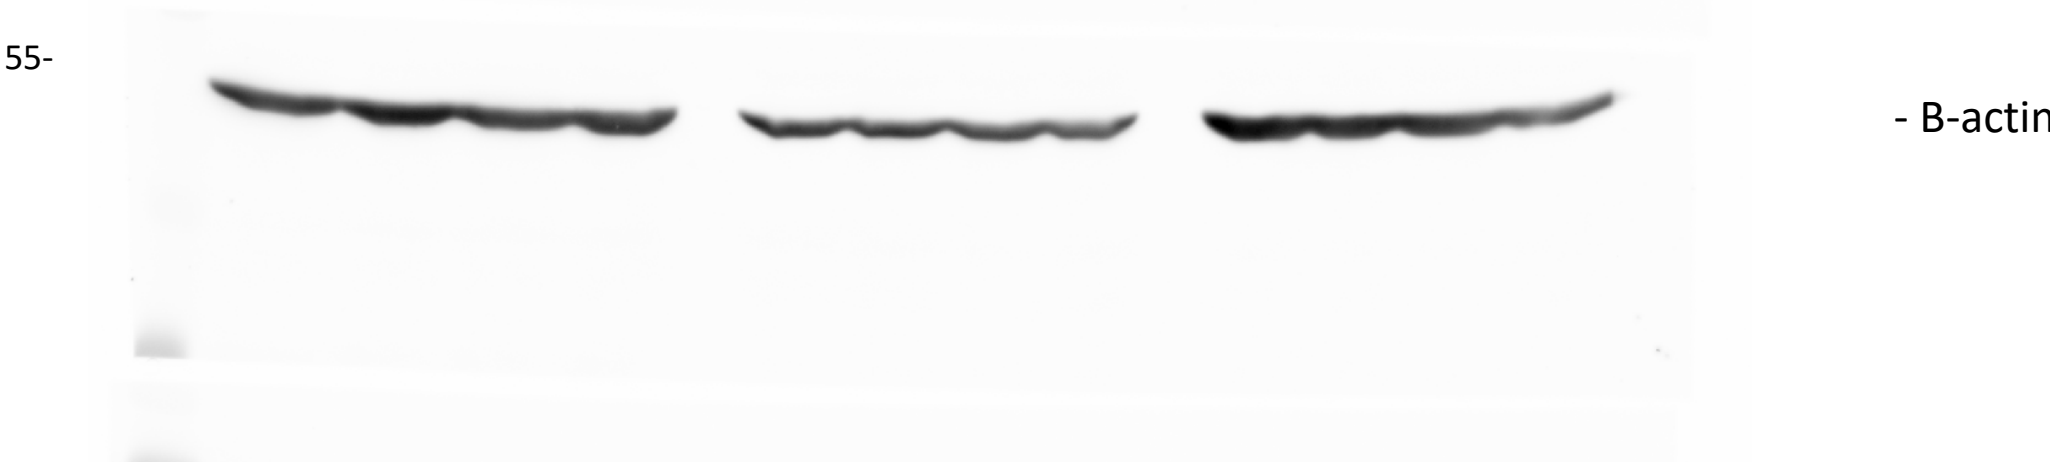

Supplement: LSA-2020-00804_SdataFS1.pdf [file LSA-2020-00804_SdataFS1.pdf]
