# Supplementary material for: IMiDs induce FAM83F degradation via an interaction with CK1α to attenuate Wnt signalling
Source: PubMed Central journal article supplement (PMC7768194; doi:10.26508/lsa.202000804), 2020-12-23

Sup. Figure 2A.

DLD-1

|                         |   |   |    |    |   |   |    |    |   |   |    |    |
|-------------------------|---|---|----|----|---|---|----|----|---|---|----|----|
| 10uM Thalidomide (hrs)  | 0 | 6 | 16 | 24 | - | - | -  | -  | - | - | -  | -  |
| 10uM Lenalidomide (hrs) | - | - | -  | -  | 0 | 6 | 16 | 24 | - | - | -  | -  |
| 10uM Pomalidomide (hrs) | - | - | -  | -  | - | - | -  | -  | 0 | 6 | 16 | 24 |

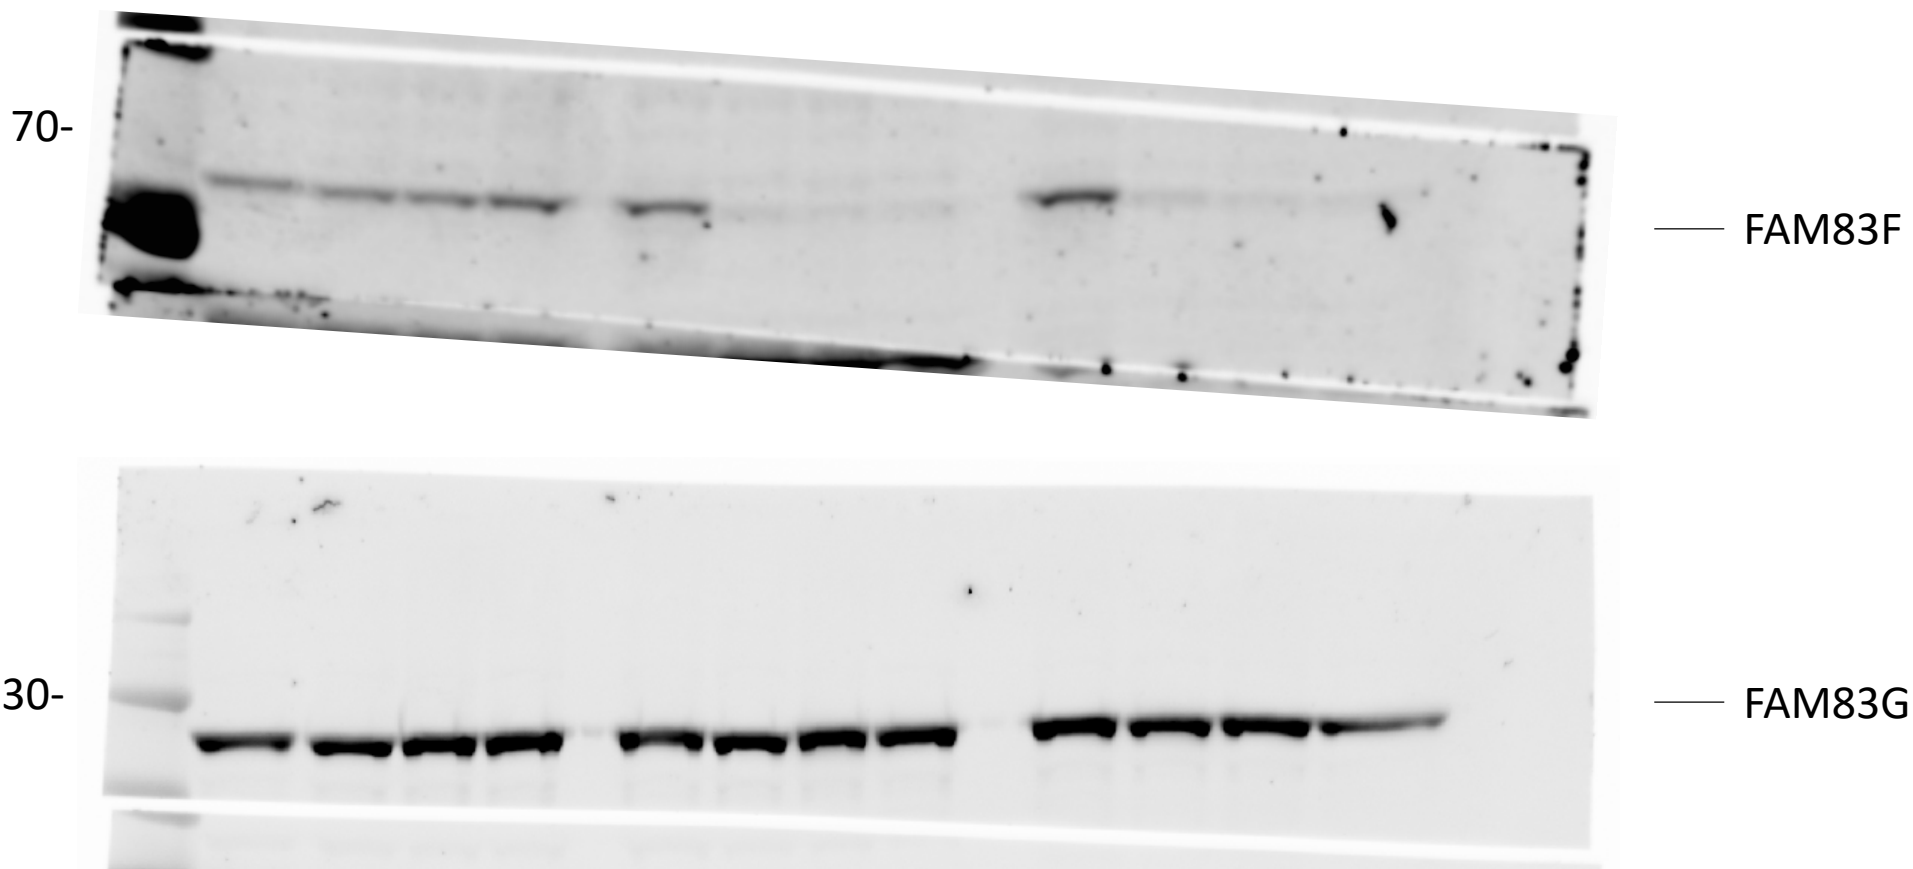

Sup. Figure 2A.

|                         | DLD-1 |   |    |    |   |   |    |    |   |   |    |    |
|-------------------------|-------|---|----|----|---|---|----|----|---|---|----|----|
| 10uM Thalidomide (hrs)  | 0     | 6 | 16 | 24 | - | - | -  | -  | - | - | -  | -  |
| 10uM Lenalidomide (hrs) | -     | - | -  | -  | 0 | 6 | 16 | 24 | - | - | -  | -  |
| 10uM Pomalidomide (hrs) | -     | - | -  | -  | - | - | -  | -  | 0 | 6 | 16 | 24 |

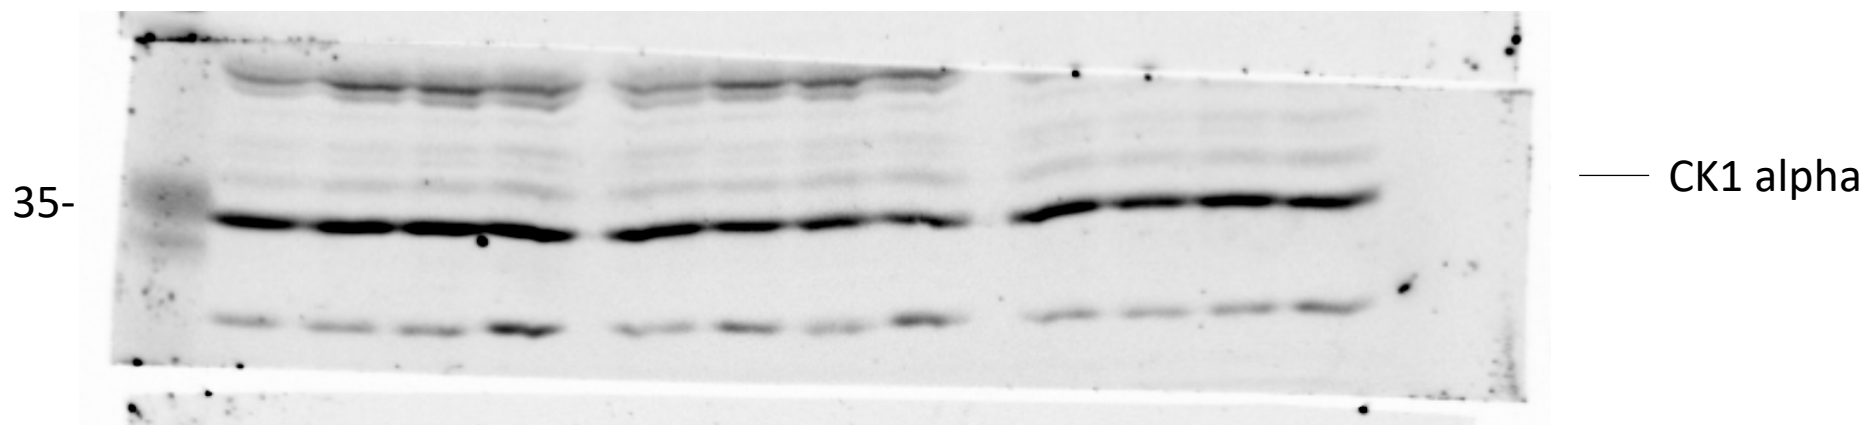

Sup. Figure 2A.

|                         | DLD-1 |   |    |    |   |   |    |    |   |   |    |    |
|-------------------------|-------|---|----|----|---|---|----|----|---|---|----|----|
| 10uM Thalidomide (hrs)  | 0     | 6 | 16 | 24 | - | - | -  | -  | - | - | -  | -  |
| 10uM Lenalidomide (hrs) | -     | - | -  | -  | 0 | 6 | 16 | 24 | - | - | -  | -  |
| 10uM Pomalidomide (hrs) | -     | - | -  | -  | - | - | -  | -  | 0 | 6 | 16 | 24 |

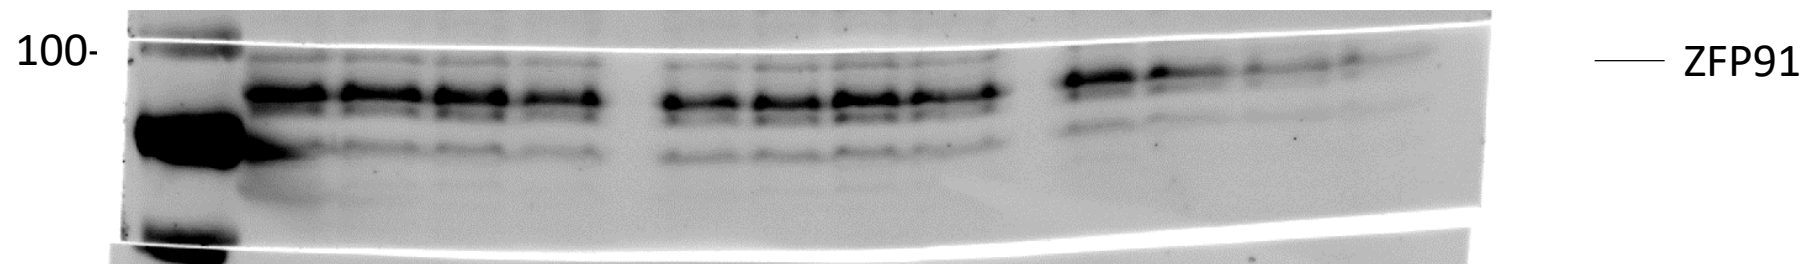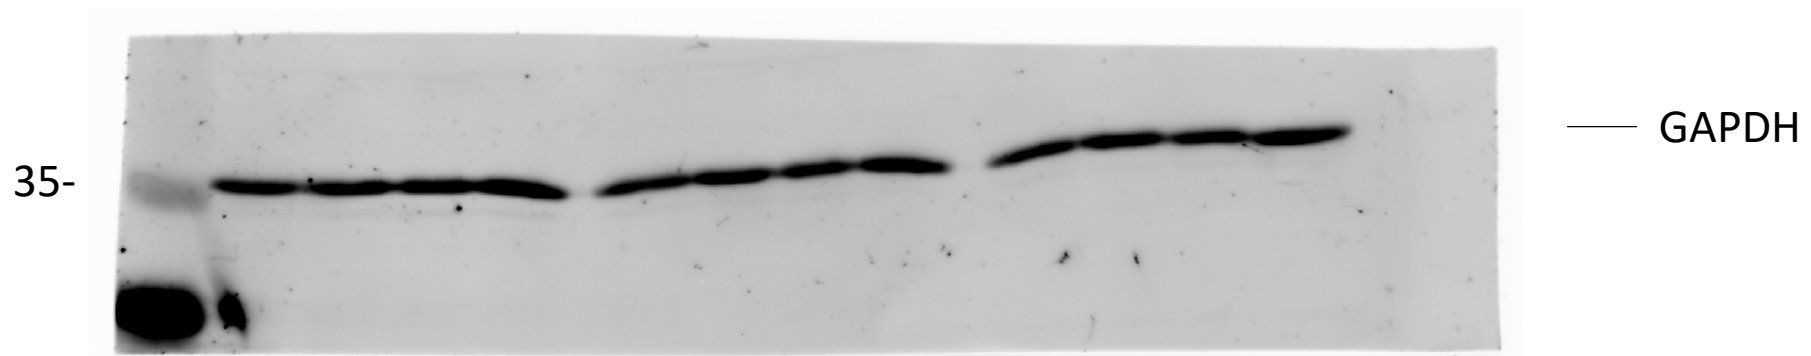

Sup. Figure 2B.

DLD-1

|                   |   |     |   |    |   |     |   |    |   |     |   |    |
|-------------------|---|-----|---|----|---|-----|---|----|---|-----|---|----|
| Thalidomide (uM)  | 0 | 0.1 | 1 | 10 | - | -   | - | -  | - | -   | - | -  |
| Lenalidomide (uM) | - | -   | - | -  | 0 | 0.1 | 1 | 10 | - | -   | - | -  |
| Pomalidomide (uM) | - | -   | - | -  | - | -   | - | -  | 0 | 0.1 | 1 | 10 |

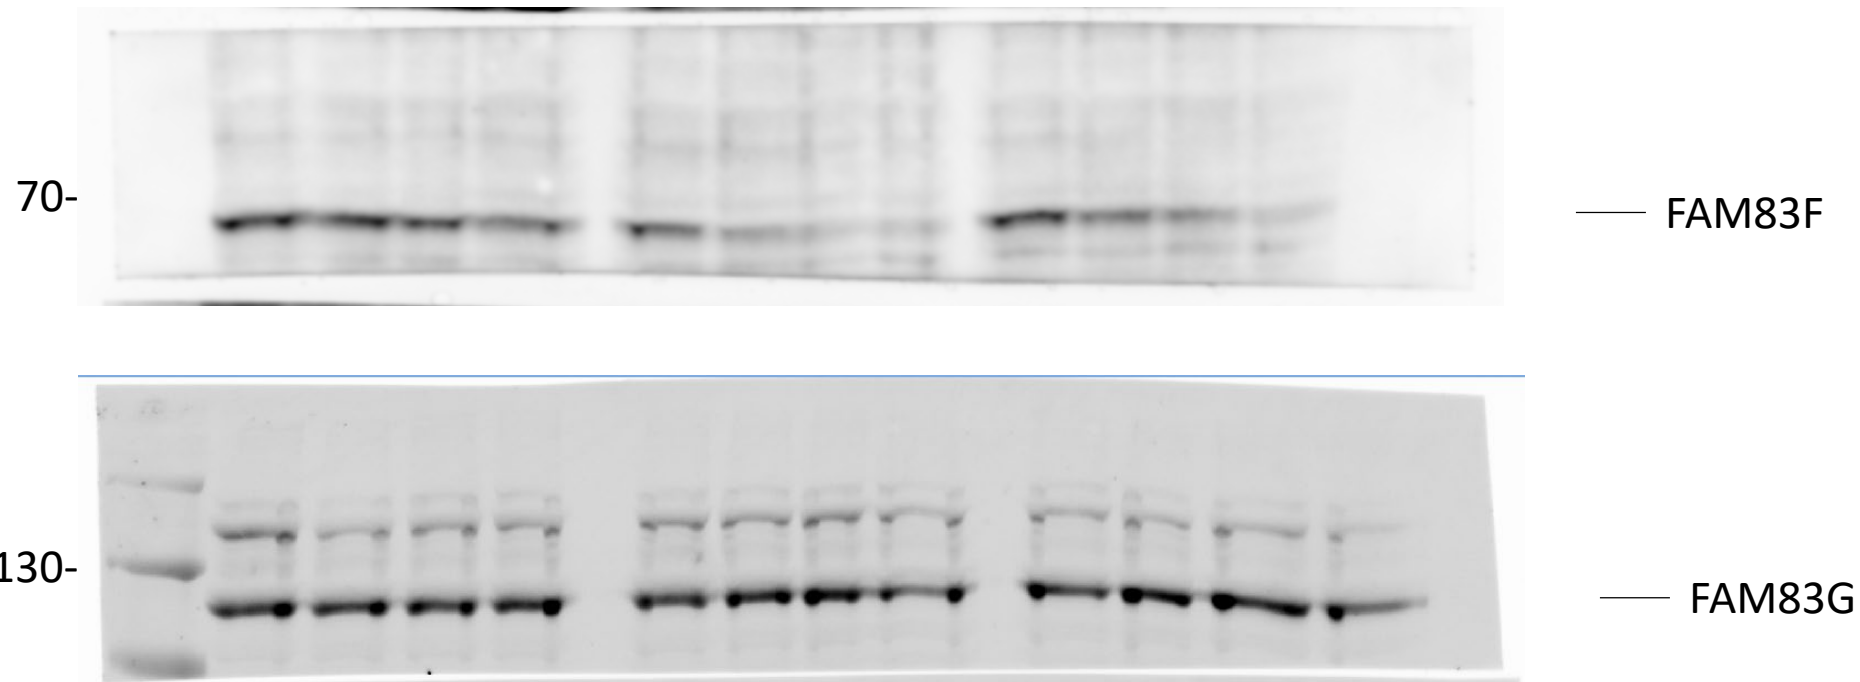

Sup. Figure 2B.

|                   | DLD-1 |     |   |    |   |     |   |    |   |     |   |    |
|-------------------|-------|-----|---|----|---|-----|---|----|---|-----|---|----|
| Thalidomide (uM)  | 0     | 0.1 | 1 | 10 | - | -   | - | -  | - | -   | - | -  |
| Lenalidomide (uM) | -     | -   | - | -  | 0 | 0.1 | 1 | 10 | - | -   | - | -  |
| Pomalidomide (uM) | -     | -   | - | -  | - | -   | - | -  | 0 | 0.1 | 1 | 10 |

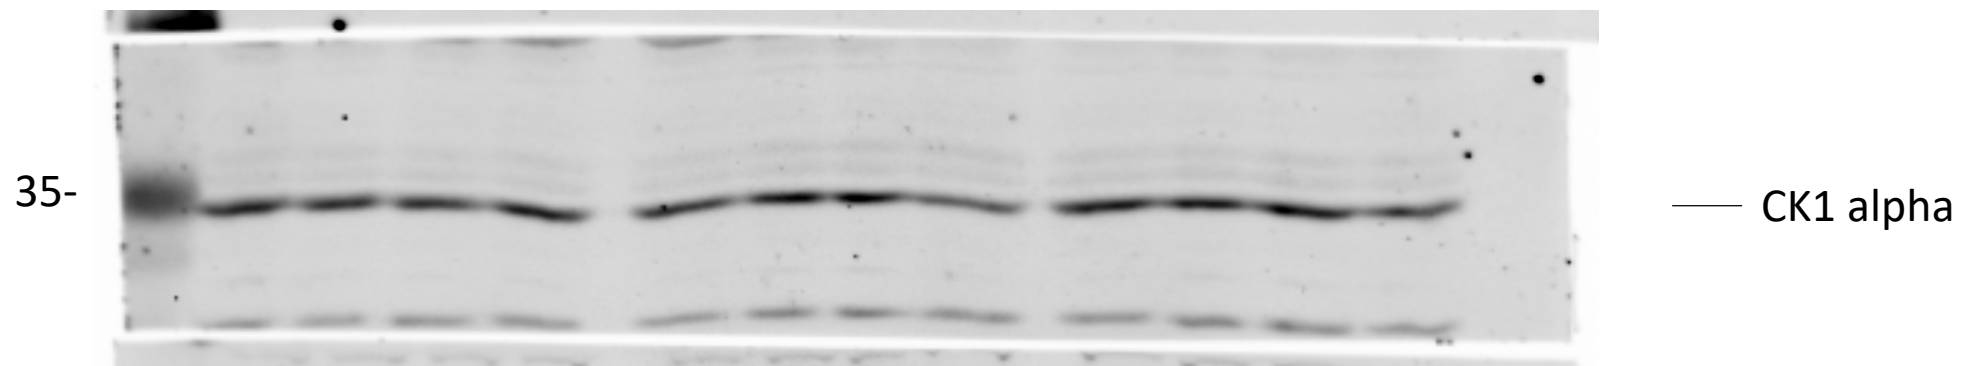

Sup. Figure 2B.

DLD-1

|                   |   |     |   |    |   |     |   |    |   |     |   |    |
|-------------------|---|-----|---|----|---|-----|---|----|---|-----|---|----|
| Thalidomide (uM)  | 0 | 0.1 | 1 | 10 | - | -   | - | -  | - | -   | - | -  |
| Lenalidomide (uM) | - | -   | - | -  | 0 | 0.1 | 1 | 10 | - | -   | - | -  |
| Pomalidomide (uM) | - | -   | - | -  | - | -   | - | -  | 0 | 0.1 | 1 | 10 |

100-

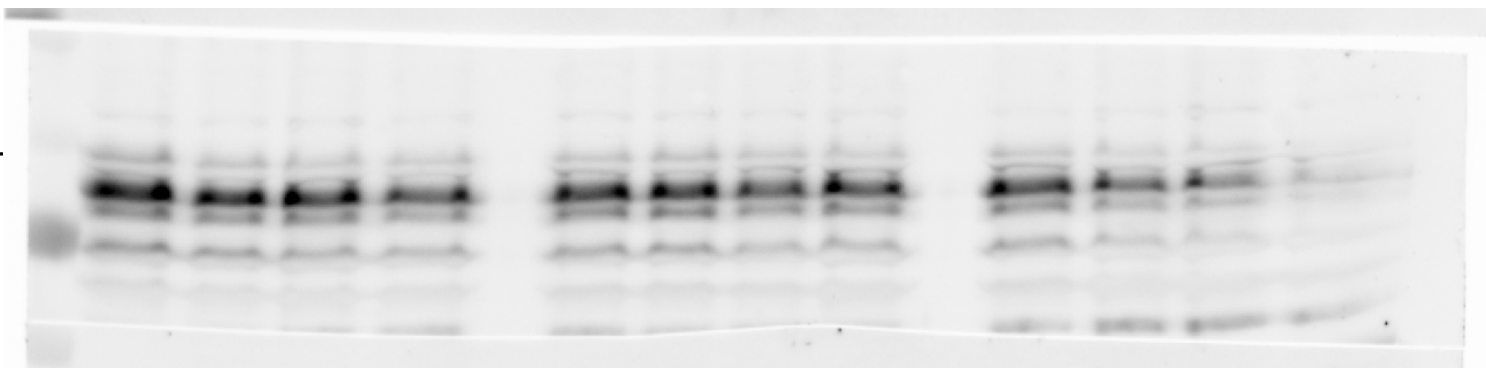

— ZFP91

35-

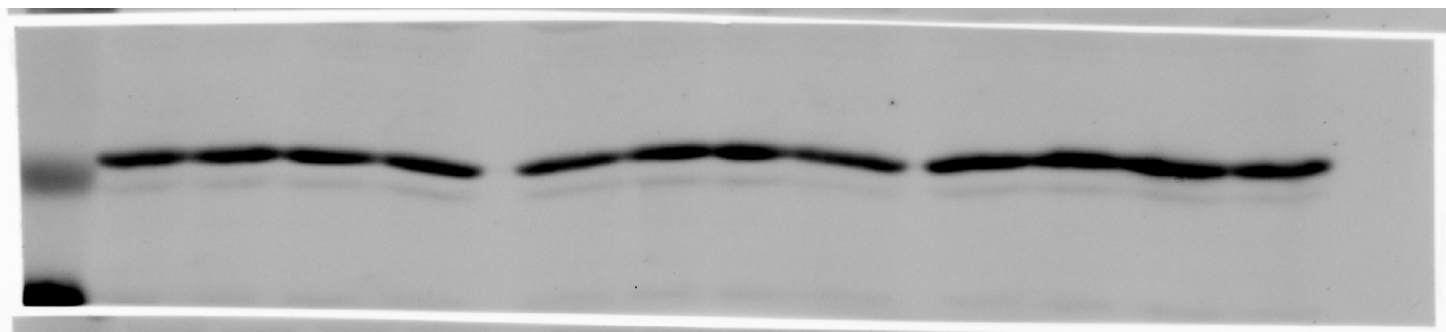

— GAPDH

Sup. Figure 2C.

|                         | HCT116 |   |   |   |   | DLD-1 |   |   |   |   |
|-------------------------|--------|---|---|---|---|-------|---|---|---|---|
| 10uM Thalidomide (24h)  | -      | + | - | - | - | -     | + | - | - | - |
| 10uM Lenalidomide (24h) | -      | - | + | - | - | -     | - | + | - | - |
| 10uM Pomalidomide (24h) | -      | - | - | + | - | -     | - | - | + | - |
| 1uM dTAG13 (24h)        | -      | - | - | - | + | -     | - | - | - | + |

70-

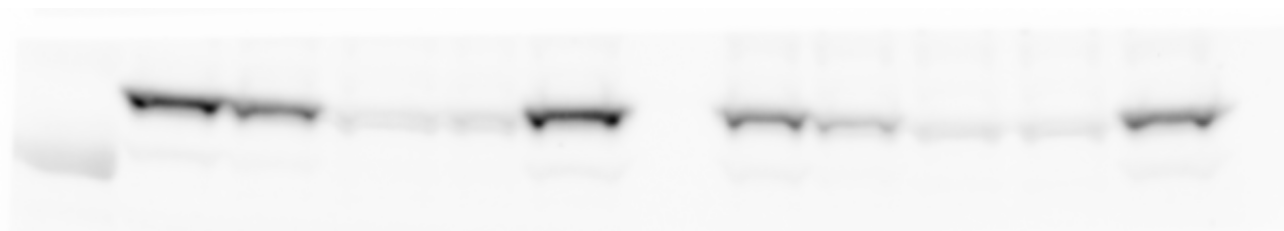

— FAM83F

35-

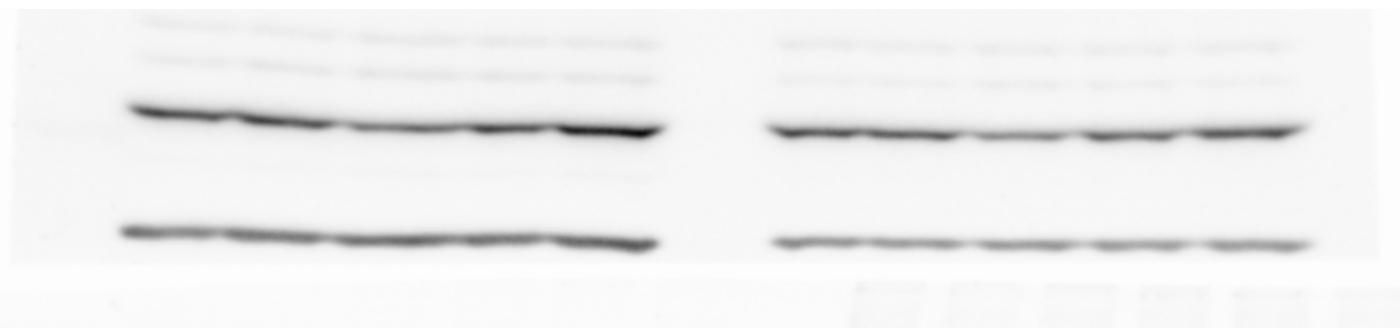

— CK1 alpha

Sup. Figure 2C.

|                         | HCT116 |   |   |   |   | DLD-1 |   |   |   |   |
|-------------------------|--------|---|---|---|---|-------|---|---|---|---|
| 10uM Thalidomide (24h)  | -      | + | - | - | - | -     | + | - | - | - |
| 10uM Lenalidomide (24h) | -      | - | + | - | - | -     | - | + | - | - |
| 10uM Pomalidomide (24h) | -      | - | - | + | - | -     | - | - | + | - |
| 1uM dTAG13 (24h)        | -      | - | - | - | + | -     | - | - | - | + |

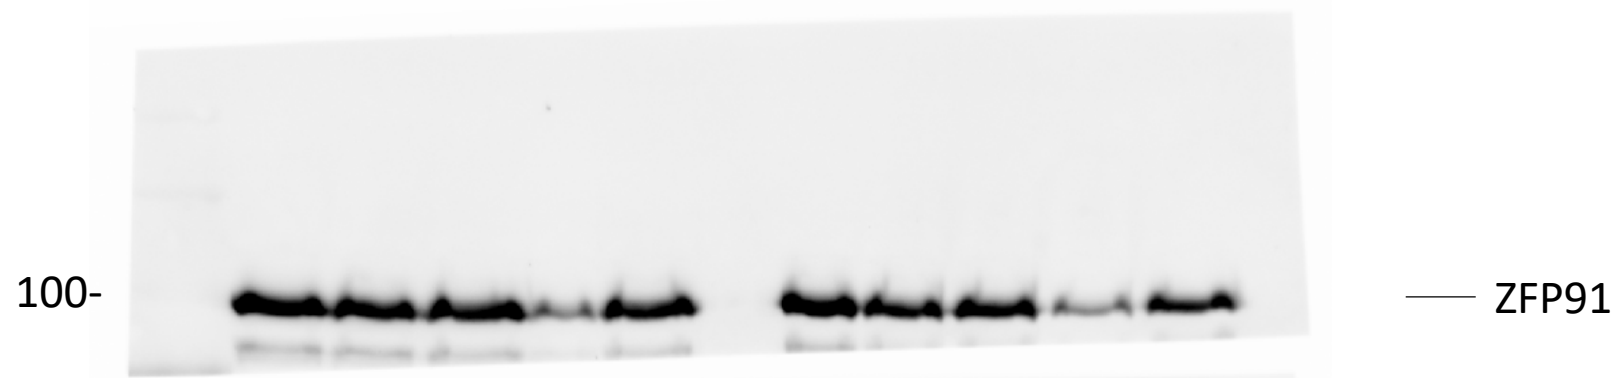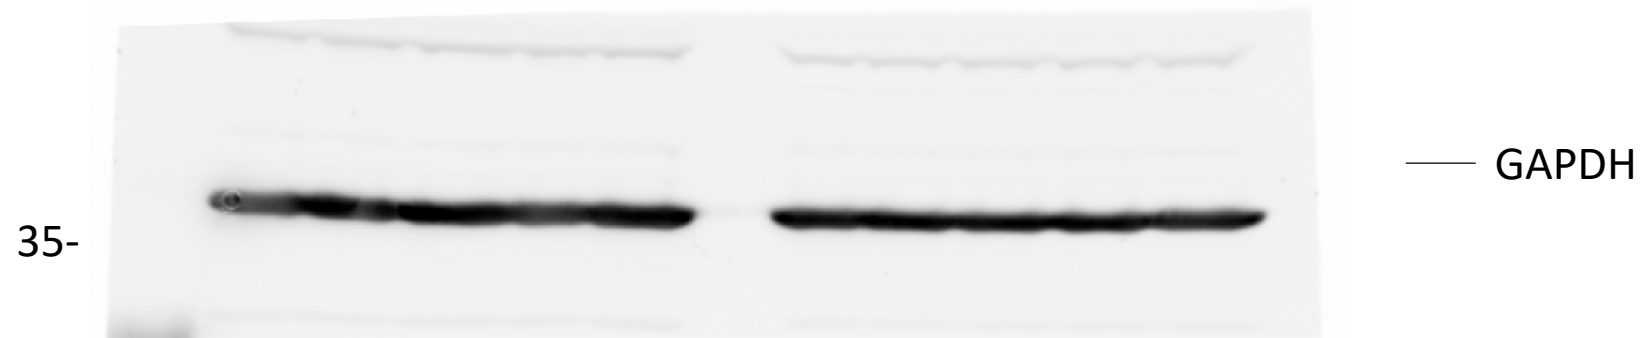

Supplement: LSA-2020-00804_SdataFS2.pdf [file LSA-2020-00804_SdataFS2.pdf]
