# Supplementary material for: IMiDs induce FAM83F degradation via an interaction with CK1α to attenuate Wnt signalling
Source: PubMed Central journal article supplement (PMC7768194; doi:10.26508/lsa.202000804), 2020-12-23

Figure 2B.

10uM Pomalidomide (24h)

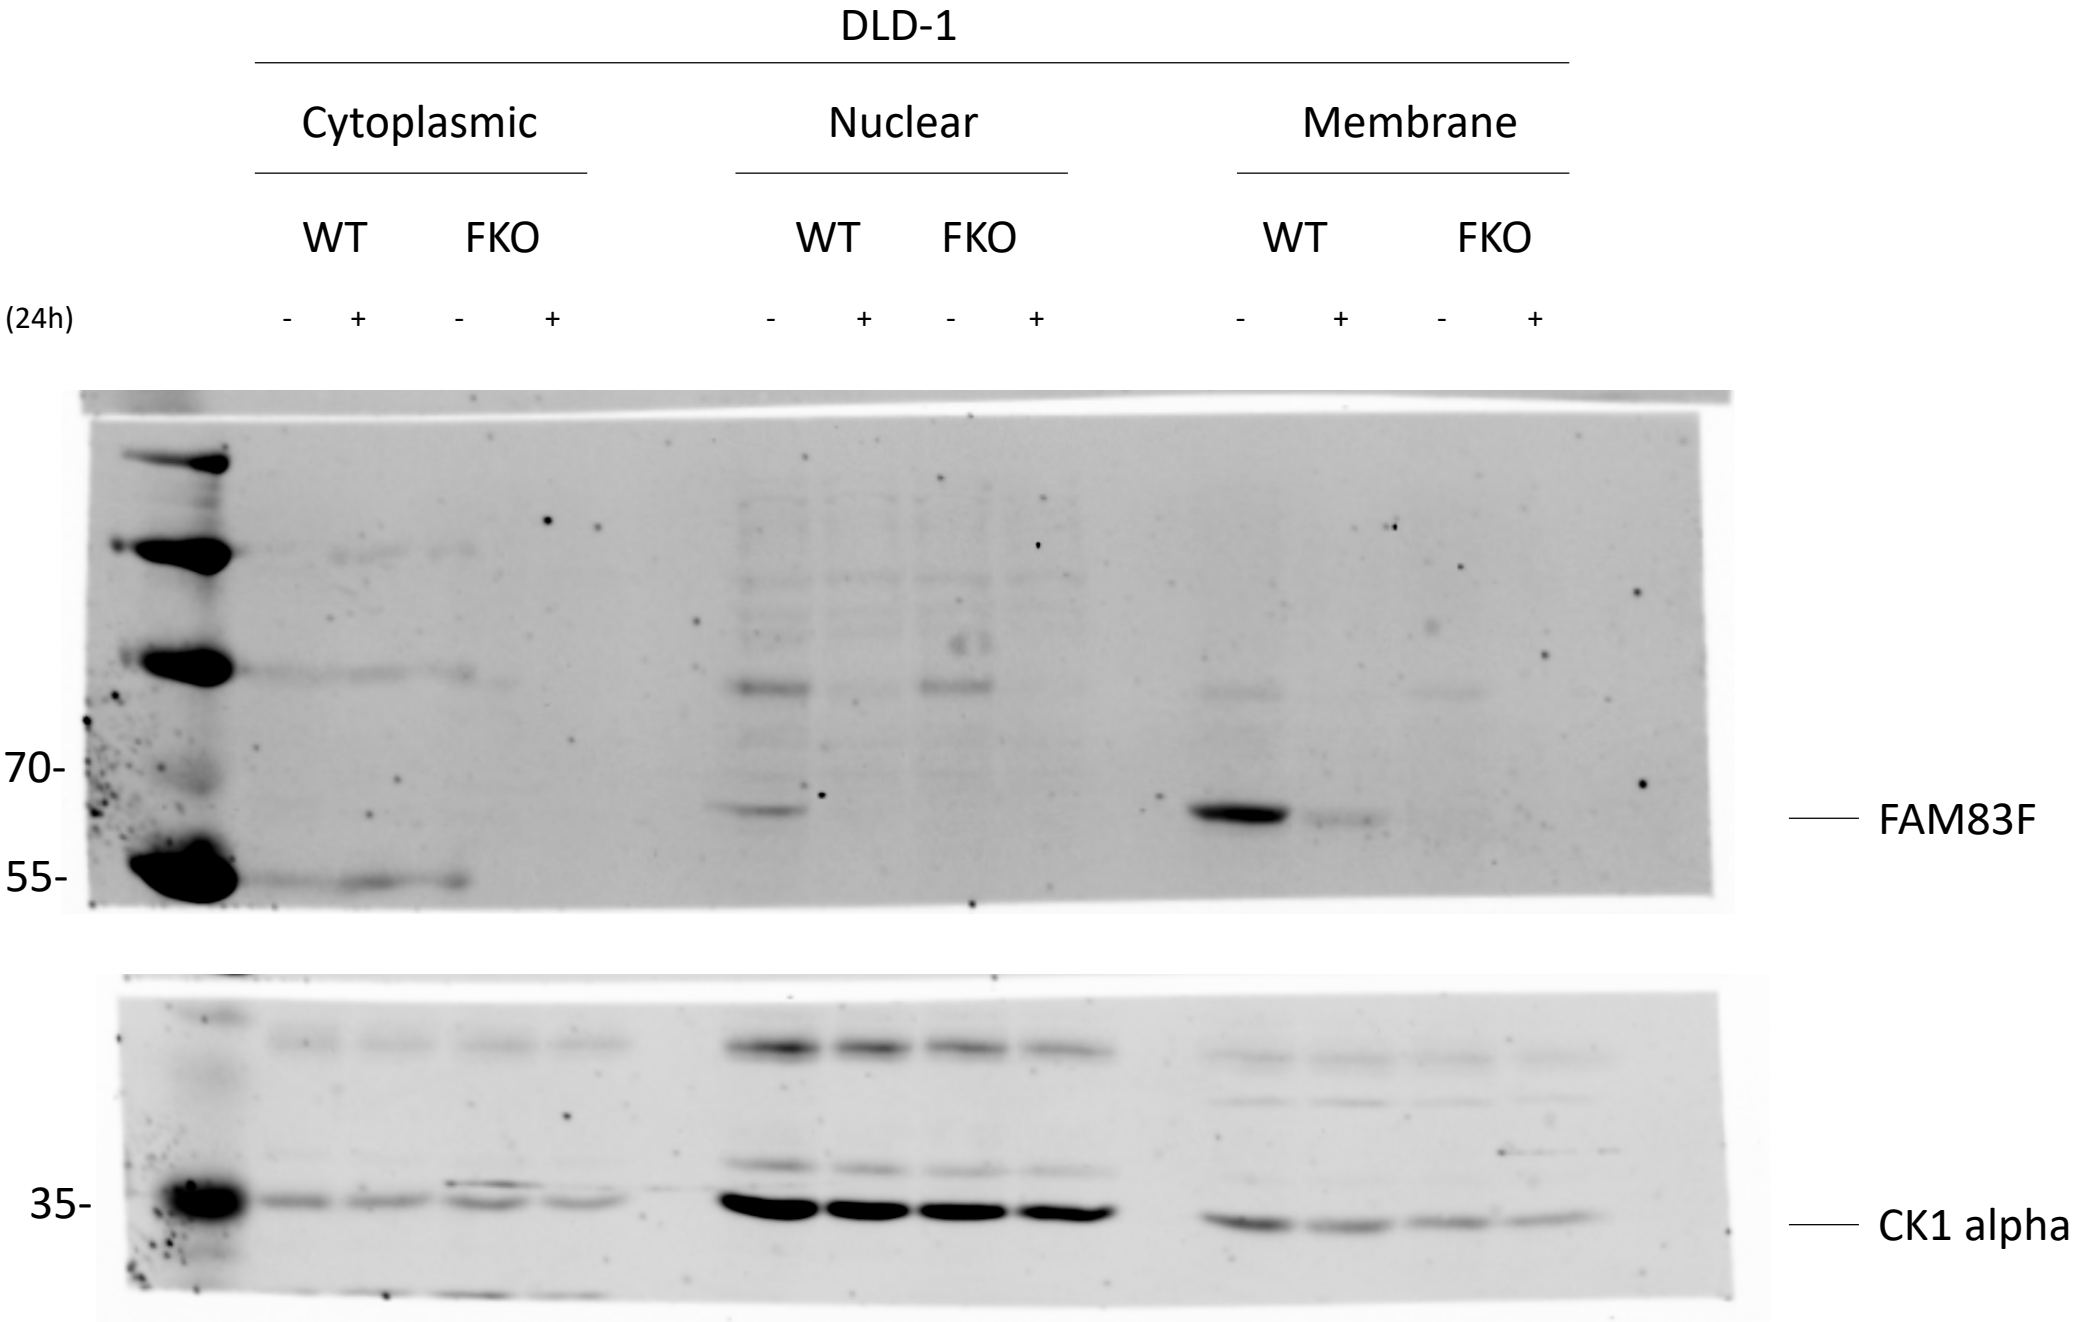

Figure 2B.

10uM Pomalidomide (24h)

|  |  | DLD-1       |   |     |   |         |   |     |   |          |   |     |   |  |  |
|--|--|-------------|---|-----|---|---------|---|-----|---|----------|---|-----|---|--|--|
|  |  | Cytoplasmic |   |     |   | Nuclear |   |     |   | Membrane |   |     |   |  |  |
|  |  | WT          |   | FKO |   | WT      |   | FKO |   | WT       |   | FKO |   |  |  |
|  |  | -           | + | -   | + | -       | + | -   | + | -        | + | -   | + |  |  |

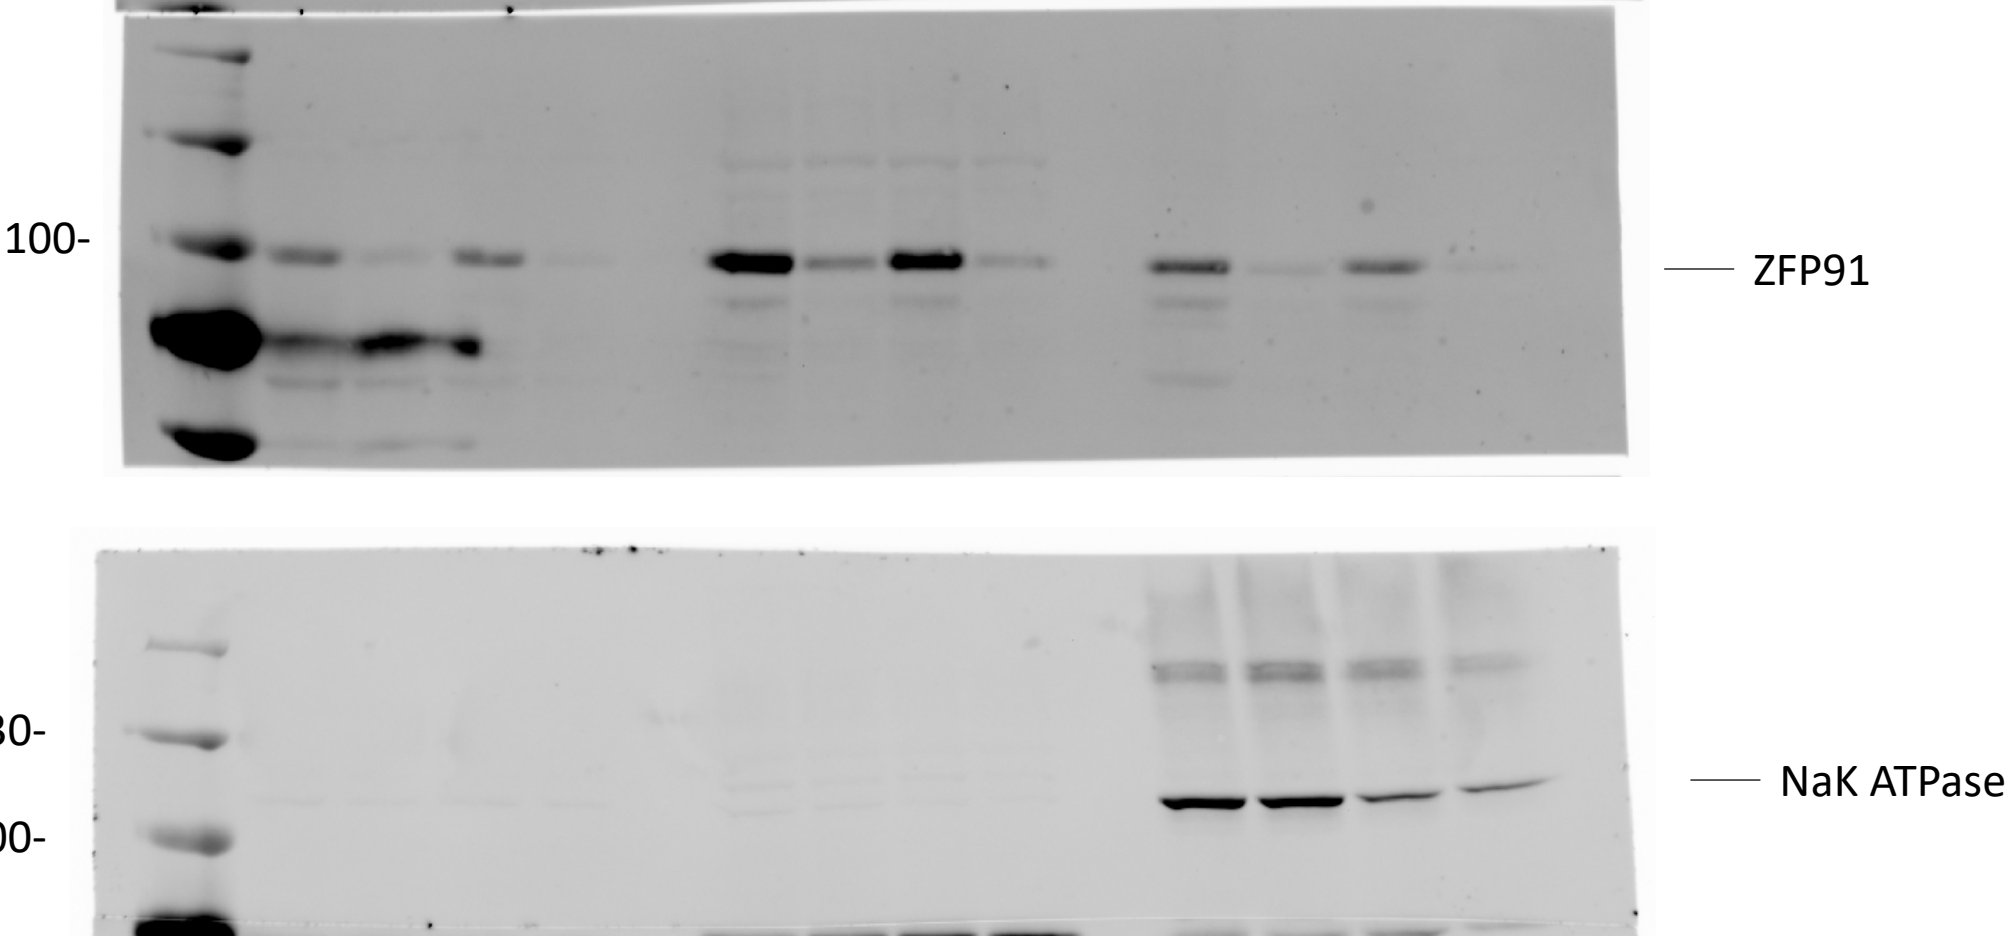

Figure 2B.

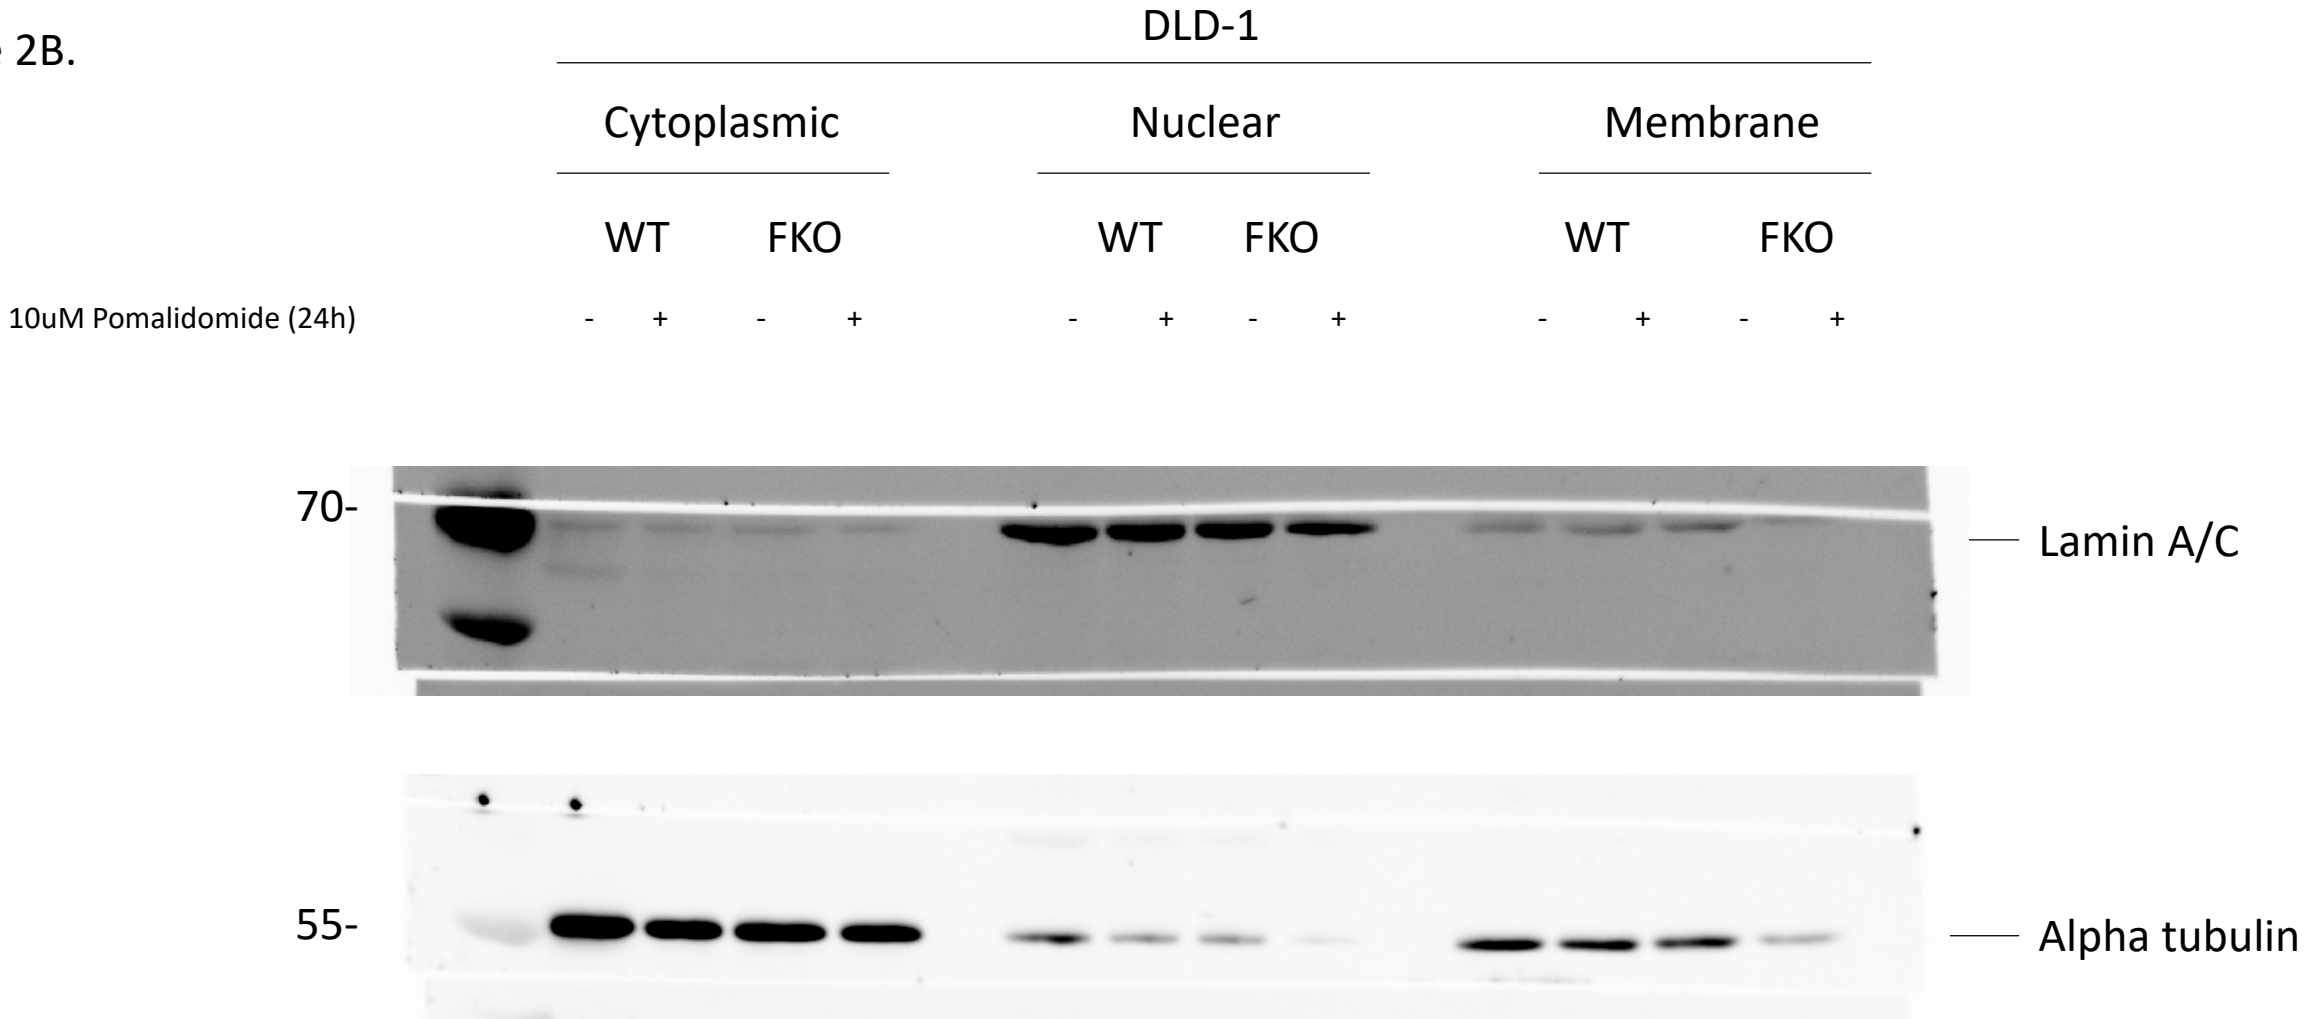

Supplement: LSA-2020-00804_SdataF2.pdf [file LSA-2020-00804_SdataF2.pdf]
