# Supplementary material for: IMiDs induce FAM83F degradation via an interaction with CK1α to attenuate Wnt signalling
Source: PubMed Central journal article supplement (PMC7768194; doi:10.26508/lsa.202000804), 2020-12-23

Figure 7B.

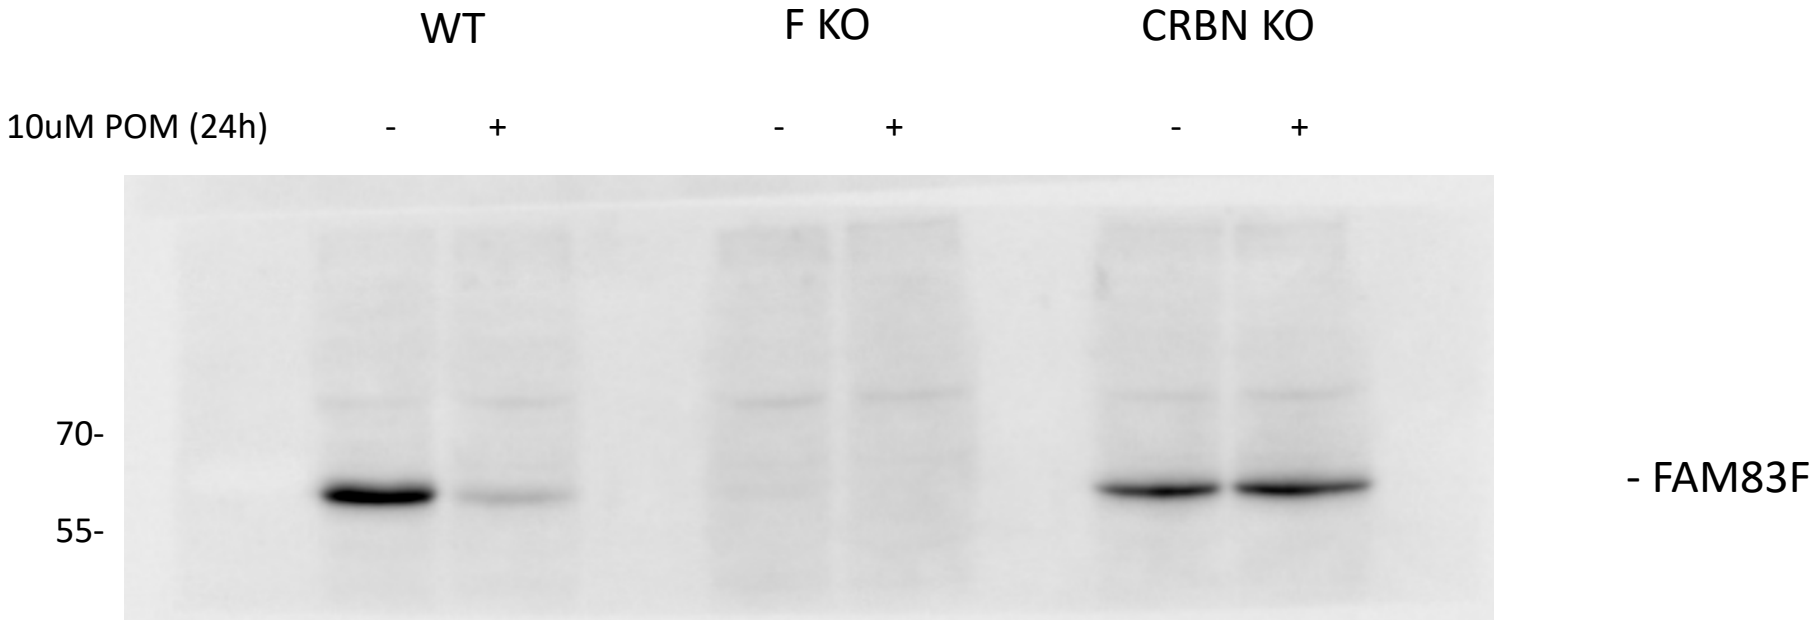

Figure 7B.

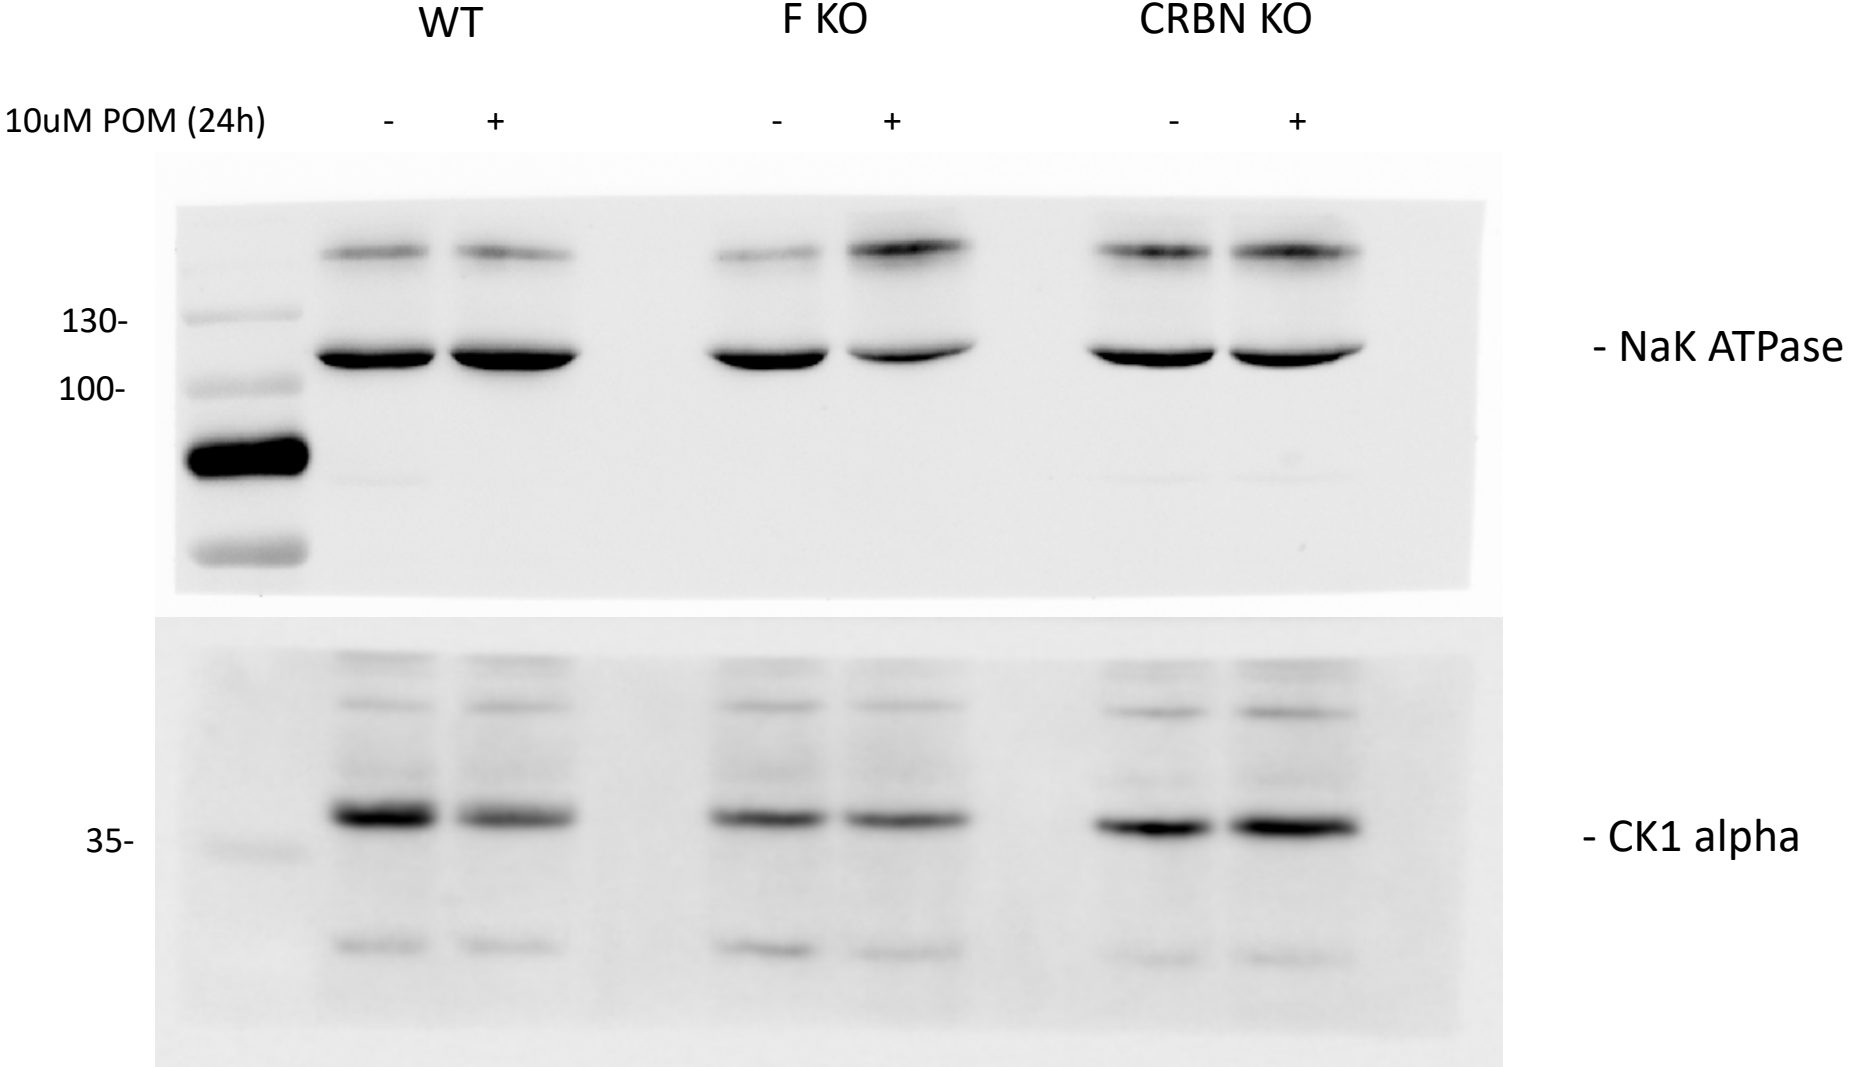

Figure 7D.

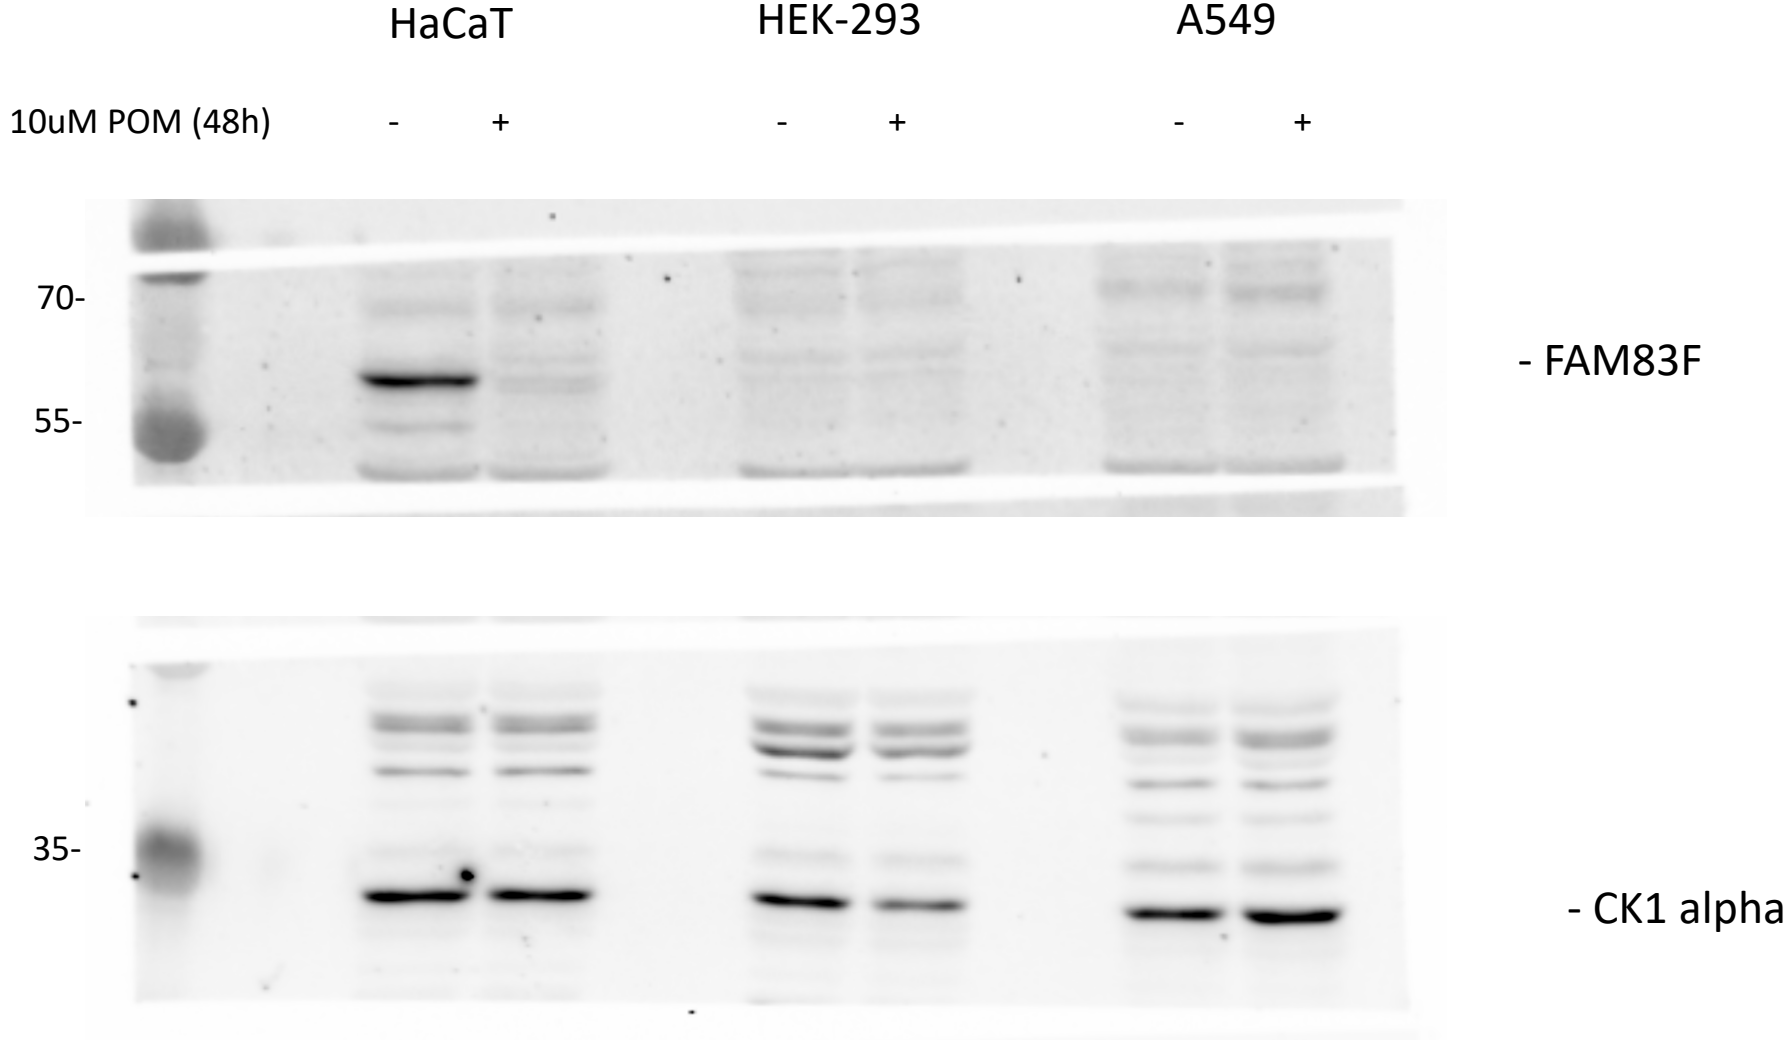

Figure 7D.

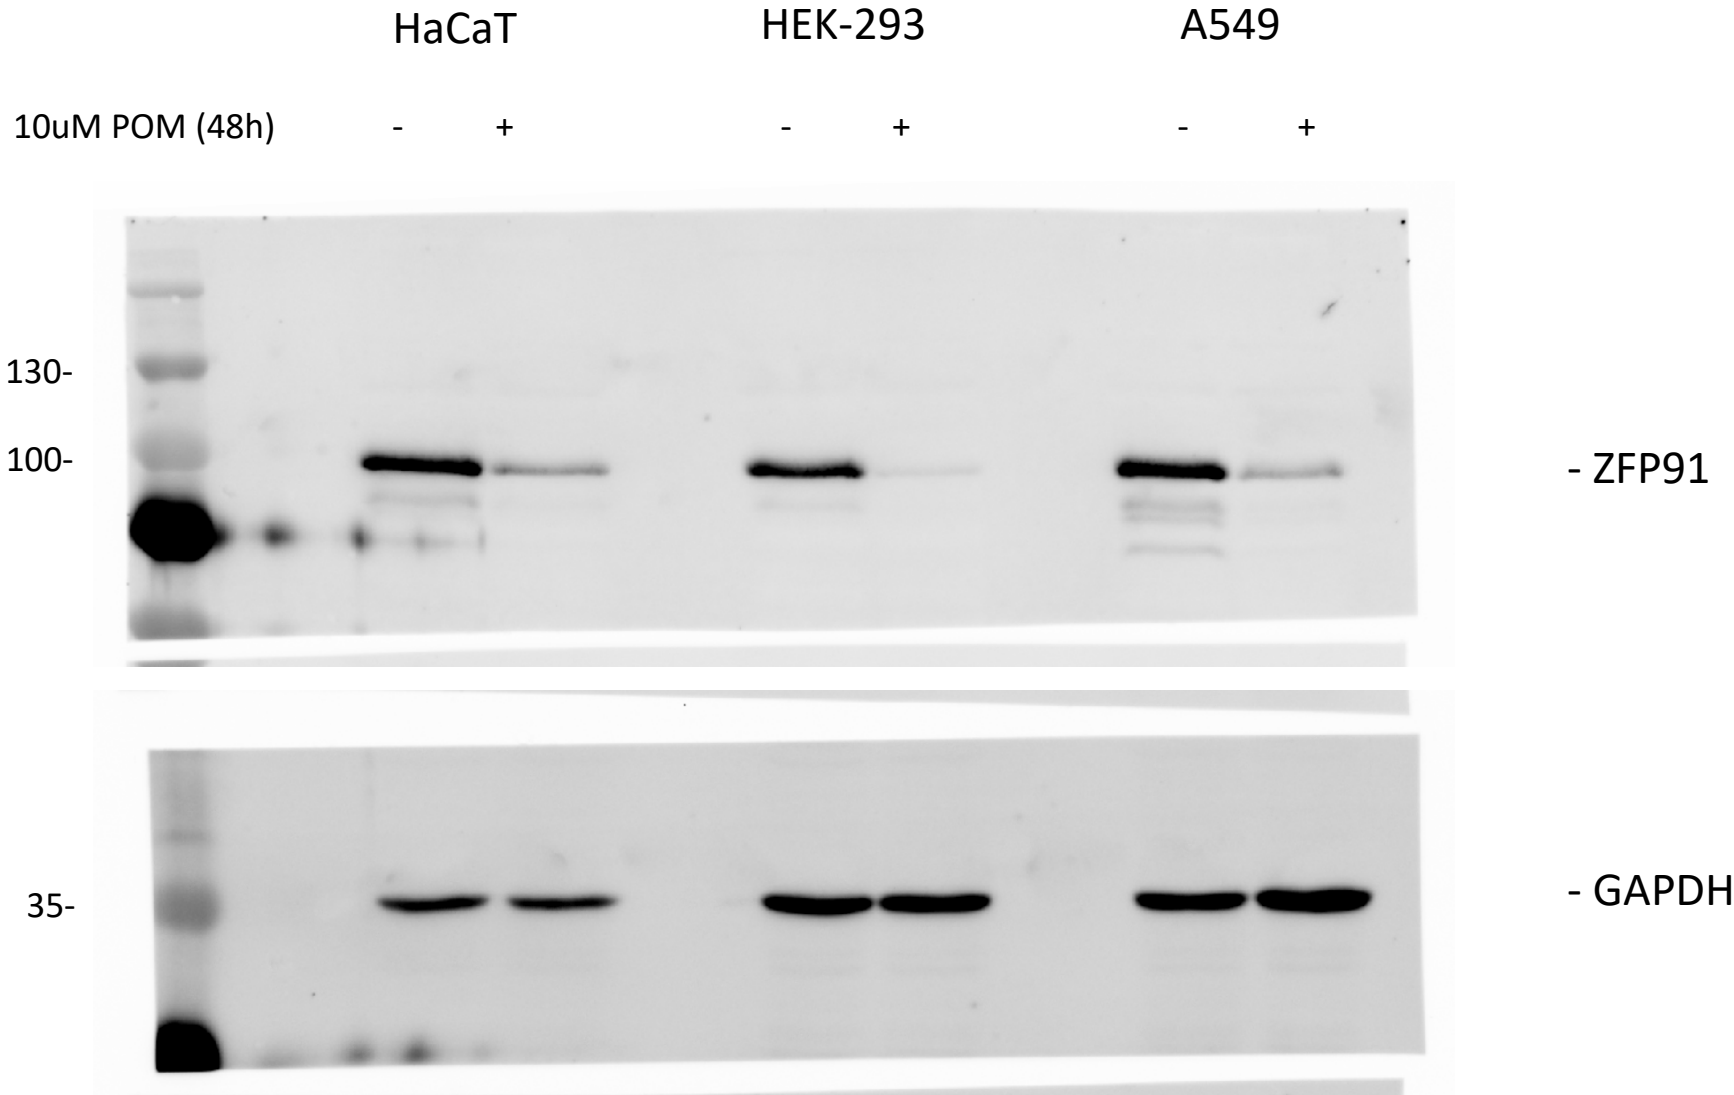

Supplement: LSA-2020-00804_SdataF7.pdf [file LSA-2020-00804_SdataF7.pdf]
